## 27 Summary

28  
29 The Gram-negative cell envelope is a remarkable structure with core components that include an  
30 inner membrane, an outer membrane, and a peptidoglycan layer in the periplasmic space between.  
31 Multiple molecular systems function to maintain integrity of this essential barrier between the  
32 interior of the cell and its surrounding environment. We show that a conserved DUF1849-family  
33 protein, EipB, is secreted to the periplasmic space of *Brucella*, a monophyletic group of intracellular  
34 pathogens. In the periplasm, EipB folds into an unusual fourteen-stranded  $\beta$ -spiral structure that  
35 resembles the LolA and LolB lipoprotein delivery system, though the overall fold of EipB is distinct  
36 from LolA/LolB. Deletion of *eipB* results in defects in *Brucella* cell envelope integrity *in vitro* and in  
37 maintenance of spleen colonization in a mouse model of *B. abortus* infection. Transposon  
38 disruption of *ttpA*, which encodes a periplasmic protein containing tetratricopeptide repeats, is  
39 synthetically lethal with *eipB* deletion. *ttpA* is a reported virulence determinant in *Brucella*, and our  
40 studies of *ttpA* deletion and overexpression strains provide evidence that this gene also contributes  
41 to cell envelope function. We conclude that *eipB* and *ttpA* function in the *Brucella* periplasmic  
42 space to maintain cell envelope integrity, which facilitates survival in a mammalian host.

## 43 Importance

44 *Brucella* species cause brucellosis, a global zoonosis. A gene encoding a conserved DUF1849-  
45 family protein, which we have named EipB, is present in all sequenced *Brucella* and several other  
46 genera in the class *Alphaproteobacteria*. This manuscript provides the first functional and structural  
47 characterization of a DUF1849 protein. We show that EipB is secreted to the periplasm where it  
48 forms a spiral-shaped antiparallel- $\beta$  protein that is a determinant of cell envelope integrity *in vitro*  
49 and virulence in an animal model of disease. *eipB* genetically interacts with *ttpA*, which also  
50 encodes a periplasmic protein. We propose that EipB and TtpA function as part of a system  
51 required for cell envelope homeostasis in select *Alphaproteobacteria*.

## 52 Introduction

53  
54 *Brucella* spp. are the causative agents of brucellosis, which afflicts wildlife and livestock on a global  
55 scale and can occur in humans through contact with infected animals or animal products (1, 2).  
56 These intracellular pathogens are members of the class *Alphaproteobacteria*, a group of Gram-  
57 negative species that exhibit tremendous diversity in metabolic capacity, cell morphology, and  
58 ecological niches (3). In their mammalian hosts, *Brucella* cells must contend with the host immune  
59 system (4) and adapt to stresses including oxidative assault from immune cells, acidic pH in the  
60 phagosomal compartment, and nutrient shifts during intracellular trafficking (5). Molecular  
61 components of the cell envelope play a key role in the ability of *Brucella* spp. to survive these  
62 stresses and to replicate in the intracellular niche (6, 7). As part of a systematic experimental survey  
63 of conserved *Alphaproteobacterial* protein domains of unknown function (DUFs), we recently  
64 described envelope integrity protein A (EipA). This periplasmic protein confers resistance to cell  
65 envelope stressors and determines *B. abortus* virulence in a mouse model of infection (8). In this  
66 study, we report a functional and structural analysis of envelope integrity protein B (EipB), a  
67 member of the uncharacterized gene family DUF1849.

68  
69

70 DUF1849 (Pfam: PF08904, (9)) is widespread among the *Rhizobiales*, *Rhodospirillales* and  
71 *Rhodobacterales* (Figure 1). To our knowledge, no functional data have been reported for this gene  
72 family other than results from a recent multi-species Tn-seq study that showed stress sensitivity in  
73 *Sinorhizobium meliloti* DUF1849 (locus *SMc02102*) mutant strains (10). Here we show that the  
74 *Brucella* DUF1849 protein, EipB (locus tag *bab1\_1186*; RefSeq locus BAB\_RS21600), is a 280-  
75 residue periplasmic protein that folds into a 14-stranded, open  $\beta$ -barrel structure containing a  
76 conserved disulfide bond. We term this novel barrel structure a  $\beta$ -spiral and show that it resembles  
77 the lipoprotein chaperone LolB, though its overall fold is distinct. Replication and survival of a *B.*  
78 *abortus* strain in which we deleted *eipB* was attenuated in a mouse infection model, and deletion  
79 of *eipB* in both *B. abortus* and *Brucella ovis* enhanced sensitivity to compounds that affect the  
80 integrity of the cell envelope. We have further shown that *B. abortus eipB* deletion is synthetically  
81 lethal with transposon disruption of gene locus *bab1\_0430*, which encodes a periplasmic  
82 tetra-tricopeptide-repeat (TPR) containing-protein that we have named TtpA. The *Brucella*  
83 *melitensis* ortholog of TtpA (locus tag BMEI1531) has been previously described as a molecular  
84 determinant of mouse spleen colonization (11), while a *Rhizobium leguminosarum* TtpA homolog  
85 (locus tag RL0936) is required for proper cell envelope function (12). We propose that TtpA and  
86 EipB coordinately function in the *Brucella* periplasm to ensure cell envelope integrity and to enable  
87 cell survival in the mammalian host niche.

88

## 89 Results

### 90 ***B. abortus eipB* is required for maintenance of mouse spleen colonization**

91 As part of a screen to evaluate the role of conserved *Alphaproteobacterial* genes of unknown  
92 function in *B. abortus* infection biology, we infected THP-1 macrophage-like cells with wild-type *B.*  
93 *abortus*, an *eipB* deletion strain ( $\Delta eipB$ ), and a genetically complemented  $\Delta eipB$  strain. Infected  
94 macrophages were lysed and colony forming units (CFU) were enumerated on tryptic soy agar  
95 plates (TSA) at 1, 24 and 48 hours post-infection. We observed no significant differences between  
96 strains at 1, 24 or 48 hours post-infection, indicating that *eipB* was not required for entry,  
97 replication or intracellular survival *in vitro* (Figure 2A).

98

99 We further evaluated the role of *eipB* in a BALB/c mouse infection model. Mice infected with  $\Delta eipB$   
100 had no significant difference in spleen weight or bacterial load compared to mice infected with  
101 wild-type *B. abortus* strain 2308 at one-week post-infection (Figure 2B). However, at 4- and 8-weeks  
102 post-infection, mice infected with the wild-type or the complemented *eipB* deletion strains had  
103 pronounced splenomegaly and a bacterial load of approximately  $5 \times 10^6$  CFU/spleen. In contrast,  
104 mice infected with  $\Delta eipB$  had smaller spleens with approximately 2 orders fewer bacteria ( $\sim 1 \times 10^4$   
105 CFU/spleen) (Figure 2B). We conclude that *eipB* is not required for initial spleen colonization but  
106 is necessary for full virulence and persistence in the spleen over an 8-week time course.

107

108 To assess the pathology of mice infected with wild-type and  $\Delta eipB$  strains, we harvested spleens  
109 at 8 weeks post-infection and fixed, mounted, and subjected the samples to hematoxylin and eosin  
110 (H&E) staining (Figure S1). Compared to naïve (uninfected) mice (Figure S1A), we observed higher  
111 extramedullary hematopoiesis, histiocytic proliferation, granulomas, and the presence of *Brucella*  
112 immunoreactivities in spleens of mice infected with wild-type *B. abortus* 2308 and the genetically-  
113 complemented mutant strain (Figure S1B and D). Both wild-type and the complemented strain

114 caused spleen inflammation with a reduced white to red pulp ratio as a result of lymphoid follicle  
115 disruption and red pulp expansion, which typically correlates with infiltration of inflammatory cells;  
116 these spleens also had increased marginal zones (Figure S1B and D). As expected from the CFU  
117 enumeration data, mice infected with  $\Delta eipB$  had reduced pathologic features: there was minimal  
118 change in white to red pulp ratio, and a minimal increase in marginal zones (Figure S1C). There was  
119 no evidence of extramedullary hematopoiesis in mice infected with  $\Delta eipB$ , though histiocytic  
120 proliferation was mildly increased. Granulomas and *Brucella* immunoreactivities were rare in  $\Delta eipB$   
121 (Figure S1C). These results are consistent with a model in which *eipB* is required for full *B. abortus*  
122 virulence in a mouse model of infection. A summary of spleen pathology scores is presented in  
123 Table S1.

124  
125 We further measured antibody responses in mice infected with  $\Delta eipB$  and wild-type strains. Serum  
126 levels of total IgG, *Brucella*-specific IgG, subclass IgG1, and subclass IgG2a were measured by  
127 enzyme-linked immunosorbent assays (ELISA) (Figure 2C-F). Antibody subclasses IgG2a and IgG1  
128 were measured as markers of T helper 1 (Th1)- and Th2-specific immune responses, respectively.  
129 At 8 weeks post-infection, total serum IgG was higher in all infected mice relative to the uninfected  
130 control (Figure 2C). The level of *Brucella*-specific IgG was approximately 5 times higher in  $\Delta eipB$ -  
131 infected mice than in mice infected with wild-type or the complemented mutant strain (Figure 2D).  
132 Uninfected mice and mice infected with wild-type,  $\Delta eipB$  and the  $\Delta eipB$ -complemented strain  
133 showed no significant difference in IgG1 levels after 8 weeks (Figure 2E). All infected mice had  
134 highly increased levels of IgG2a at 8 weeks post infection relative to naïve mice, though there was  
135 no difference between *B. abortus* strains (Figure 2F). We conclude that  $\Delta eipB$  infection results in  
136 production of more *B. abortus*-specific antibodies than wild-type. Subclasses IgG1 and IgG2a do  
137 not apparently account for the higher levels of these specific antibodies. Large induction of IgG2a  
138 by all *B. abortus* strains is consistent with the known ability of *B. abortus* to promote a strong Th1  
139 response (13, 14). However,  $\Delta eipB$  does not induce a more robust Th1 response than wild-type  
140 based on our IgG2a measurements. We did not test whether antibodies contribute to clearance of  
141 the  $\Delta eipB$  strain. Enhanced *Brucella*-specific antibody production may simply be a consequence of  
142 antigen release triggered by host clearance of  $\Delta eipB$  by other immune mechanisms.

#### 143 144 **The $\Delta eipB$ strain is sensitive to cell envelope stressors**

145 To test whether reduced virulence of  $\Delta eipB$  correlates with an increased sensitivity to stress *in vitro*,  
146 we evaluated *B. abortus*  $\Delta eipB$  growth on TSA plates supplemented with known cell  
147 membrane/envelope stressors including EDTA, ampicillin and deoxycholate.  $\Delta eipB$  had 1.5 to 3  
148 orders fewer CFUs compared to wild-type when titered on TSA plates containing these  
149 compounds. All phenotypes were complemented by restoring the  $\Delta eipB$  locus to wild-type (Figure  
150 3A). Together, these data provide evidence that *eipB* contributes to resistance to compounds that  
151 compromise the integrity of the *B. abortus* cell membrane/envelope.

152  
153 Although  $\Delta eipB$  CFUs were reduced relative to wild-type on agar plates containing all three  
154 envelope stressors that we assayed, we observed no apparent defects in  $\Delta eipB$  cell morphology  
155 by light microscopy or cryo-electron microscopy when cultivated in liquid broth (Figure 3B and C).  
156 Incubation of  $\Delta eipB$  with 2 mM EDTA or 5  $\mu$ g/ml ampicillin (final concentration) in *Brucella* broth  
157 for 4 hours also had no apparent effect on cell structure, nor did *eipB* overexpression (Figure 3B

158 and C). Longer periods of growth in the presence of stressors may be required for differences in  
159 cell morphology/structure to be evident in broth. It may also be the case that the envelope stress  
160 phenotypes we observe are particular to growth on solid medium.

161  
162 ***B. abortus*  $\Delta eipB$  agglutination phenotypes indicate the presence of smooth LPS**

163 In *B. abortus*, smooth LPS (containing O-polysaccharide) is an important virulence determinant (15).  
164 Smooth LPS can also act as a protective layer against treatments that compromise the integrity of  
165 the cell envelope (16). Loss of smooth LPS in *B. abortus*  $\Delta eipB$  could therefore explain the  
166 phenotypes we observe for this strain. To test this hypothesis, we assayed wild-type and  $\Delta eipB$   
167 agglutination in the presence of serum from a *B. abortus*-infected mouse. A major serological  
168 response to smooth *Brucella* species is to O-polysaccharide (17), and thus agglutination can  
169 provide an indirect indication of the presence or absence of smooth LPS on the surface of the cell.  
170 Both wild-type and  $\Delta eipB$  strains agglutinated in the presence of serum from a *B. abortus*-infected  
171 mouse, providing evidence for the presence of O-polysaccharide in  $\Delta eipB$  (Figure S2A). As a  
172 negative control, we incubated the naturally rough species *B. ovis* with the same serum; *B. ovis* did  
173 not agglutinate in the presence of this serum (Figure S2A). We further assayed agglutination of *B.*  
174 *abortus* wild-type and  $\Delta eipB$  strains in the presence of acriflavine, which is demonstrated to  
175 agglutinate rough strains such as *B. ovis* (18, 19). After 2 hours of incubation, we observed no  
176 agglutination of wild-type *B. abortus* or  $\Delta eipB$  (Figure S2B). We treated *B. ovis* with acriflavine as  
177 a positive control and observed agglutination as expected (Figure S2B). Together, these data  
178 indicate that deletion of *eipB* does not result in a loss of smooth LPS. However, we cannot rule out  
179 the possibility that the chemical structure of O-polysaccharide is altered in  $\Delta eipB$ .

180  
181 **EipB is a monomeric protein that is secreted to the periplasm**

182 The N-terminus (residues M1-A30) of *Brucella* EipB contains a predicted signal peptide based on  
183 SignalP 4.2 analysis (20). EipB (DUF1849) homologs in other *Alphaproteobacteria* also have a  
184 predicted N-terminal secretion signal (Figure S3). We note that EipB in our wild-type *B. abortus*  
185 2308 strain has a methionine instead of a leucine at position 250. These two amino acids are  
186 interchangeable at this position in DUF1849 (Figure S4). To test the prediction that EipB is a  
187 periplasmic protein, we fused the *Escherichia coli* periplasmic alkaline phosphatase gene (*phoA*) to  
188 *B. abortus* *eipB* and expressed fusions from a *lac* promoter in *B. ovis*. We generated (i) the full-  
189 length EipB protein (M1-K280) fused at its C-terminus to *E. coli* PhoA (EipB-PhoA<sub>Ec</sub>) and (ii) an EipB-  
190 PhoA fusion lacking the hypothetical EipB signal peptide sequence (EipB<sup>S29-K280</sup>-PhoA<sub>Ec</sub>). After  
191 overnight growth in *Brucella* broth in presence or absence of 1 mM isopropyl  $\beta$ -D-1-  
192 thiogalactopyranoside (IPTG), we adjusted each culture to the same density and loaded into a 96-  
193 well plate containing 5-bromo-4-chloro-3-indolyl phosphate (BCIP, final concentration 200  $\mu$ g/ml).  
194 BCIP is hydrolyzed to a blue pigment by PhoA, which can be measured colorimetrically. BCIP  
195 diffusion through the inner membrane is inefficient, and thus this reagent can be used to specifically  
196 detect PhoA activity in the periplasmic space or in the extracellular medium (21). After a 2-hour  
197 incubation at 37°C, the well containing the *B. ovis* cells expressing the EipB<sup>M1-K280</sup>-PhoA<sub>Ec</sub> fusion  
198 turned dark blue. We observed no color change in the well containing the *B. ovis* strain expressing  
199 the EipB<sup>S29-K280</sup>-PhoA<sub>Ec</sub> protein fusion (Figure 4A). As expected, no color change was observed in  
200 absence of induction with 1 mM IPTG (Figure 4A). To test if EipB is secreted from the cell into the  
201 growth medium, we performed a similar experiment on spent medium supernatants from the

202 different cultures. We observed no color change in these samples after 2 hours of incubation  
203 providing evidence that EipB<sup>M1-K280</sup>-PhoA<sub>Ec</sub> is not secreted from the cell.

204

205 We further assayed the oligomeric state of affinity-purified *B. abortus* EipB in solution by size-  
206 exclusion chromatography. The calculated molecular mass of His<sub>6</sub>-EipB (V31-K280) is 30.7 kDa. This  
207 protein eluted from a sizing column at a volume with an apparent molecular mass of ~23 kDa,  
208 which is consistent with a monomer (Figure 4B). There was no evidence of larger oligomers by size-  
209 exclusion chromatography. From these data, we conclude that EipB is a monomeric periplasmic  
210 protein.

211

### 212 **EipB folds into a spiral-like $\beta$ -sheet that resembles PA1994, LolA and LolB**

213 We postulated that the three-dimensional structure of EipB may provide molecular-level insight  
214 into its function in the cell. As such, we solved an x-ray crystal structure of *B. abortus* EipB (residues  
215 A30-K280; PDB ID: 6NTR). EipB lacking its signal peptide formed triclinic crystals ( $a=47.4$  Å  $b=69.2$   
216 Å,  $c=83.2$  Å,  $\alpha=90.1^\circ$ ,  $\beta=90.0^\circ$ ,  $\gamma=78.7^\circ$ ) that diffracted to 2.1 Å resolution; we refined this structure  
217 to  $R_{\text{work}}=0.195$  and  $R_{\text{free}}=0.245$ . Crystallographic data and refinement statistics are summarized in  
218 Table S2. Four EipB molecules (chains A-D) are present in the crystallographic asymmetric unit.

219

220 Each EipB monomer consists of 14 antiparallel  $\beta$ -strands ( $\beta$ 1- $\beta$ 14) forming an oval, spiral-like  $\beta$ -  
221 sheet (minor axis diameter: ~25 Å; major axis diameter: ~35 Å). Two regions of this  $\beta$ -spiral,  
222 involving  $\beta$ 5,  $\beta$ 6,  $\beta$ 7,  $\beta$ 8 and the hairpin loop connecting  $\beta$ 9 and  $\beta$ 10, overlap (Figure 5A and B).  
223 Interactions between these two overlapping portions of structure are mostly hydrophobic, though  
224 polar contacts are also found in these regions (Figures 5 and 6). One side of the spiral is occluded  
225 by the N-terminus, a loop connecting  $\beta$ -strands 12 and 13, and  $\alpha$ -helix 1, which form the bottom  
226 of this “cup” shaped protein (Figures 5 and 6A). The external surface of EipB is positively and  
227 negatively charged, and also presents small hydrophobic patches (Figure S5); one helix,  $\alpha$ 2, is  
228 kinked and positioned at the surface of the cylindrical  $\beta$ -spiral (Figure 5A and B). The lumen of EipB  
229 is solvent accessible and is partially filled with the side chains of hydrophobic or acidic residues.  
230 Hydrophobic residues represent ~66% of the residues present inside the EipB cavity (Figures 5 and  
231 6B). The size of this cavity suggests that EipB, in this conformation, can accommodate small  
232 molecules or ligands in its lumen.

233

234 We searched the EipB structure against the protein structure database using Dali (22), but failed  
235 to identify clear structural homologs. *Pseudomonas aeruginosa* PA1994 (PDB ID: 2H1T) (23) was  
236 the closest structural match to EipB (RMSD ~3.5; Z-score ~11) (Figure S6A). Despite very low  
237 sequence identity (~8%), PA1994 has noticeable structural similarities to EipB: it adopts a spiral-  
238 like  $\beta$ -fold involving 15  $\beta$ -strands, which is occluded at one end with a long  $\alpha$ -helix. Unlike EipB,  
239 PA1994 lacks a signal peptide and is predicted to be a cytoplasmic protein. Structural parallels  
240 between PA1994 and the periplasmic lipoprotein chaperones LolA/LolB have been noted and a  
241 role for PA1994 in glycolipid metabolism has been postulated (23), though this prediction remains  
242 untested. Like PA1994, EipB has structural similarities to LolA and LolB, in particular the antiparallel  
243 and curved  $\beta$ -sheet scaffold that engulfs a central  $\alpha$ -helical plug (Figure S6B). Whether *Brucella*  
244 EipB, or DUF1849 proteins more generally, function in trafficking lipoproteins or other molecules  
245 in the periplasm remains to be tested.

246

### 247 **EipB has a conserved disulfide bond**

248 We identified two cysteines in EipB, C69 and C278, which are the two most conserved residues in  
249 the DUF1849 sequence family (Figures S3 and S4). C69 is solvent exposed in *Brucella* EipB and  
250 positioned in a loop connecting  $\beta$ 2 and  $\beta$ 3. C278 is present at the C-terminus of the protein, which  
251 immediately follows  $\beta$ 14.  $\beta$ 14 interacts with  $\beta$ 13 and  $\beta$ 1, and is spatially proximal to  $\beta$ 2 and  $\beta$ 3  
252 (Figure 7A). Given the proximity of these two cysteines in the EipB structure, we hypothesized that  
253 C69 and C278 form an internal disulfide bond. However, electron density for the 10 C-terminal  
254 residues (containing C278) is not well resolved in the EipB crystal structure, and a disulfide bond is  
255 not evident, likely because the protein was dialyzed against a buffer containing 2 mM 1,4-  
256 dithiothreitol (DTT) prior to crystallization.

257

258 To biochemically test if these two cysteines form a disulfide bond, we purified *B. abortus* EipB  
259 under non-reducing conditions and mixed the protein with SDS gel loading dye with or without 1  
260 mM dithiothreitol (DTT). We observed two bands that migrated differently in the 30 kDa region  
261 when the protein was resolved by 12% SDS-PAGE. EipB without DTT migrated farther than the  
262 DTT-treated protein, suggesting the presence of a disulfide bond (Figure 7B). We performed this  
263 same experiment with three different EipB cysteine mutant proteins in which C69, C278, or both  
264 were mutated to serine. In the absence of DTT, EipB<sup>C69S</sup> and EipB<sup>C278S</sup> migrated at an apparent  
265 molecular weight of ~60 kDa, corresponding to a dimeric EipB interacting through a S-S bond.  
266 After DTT treatment, these mutant proteins migrated the same as the reduced wild-type protein  
267 (Figure 7B). As expected, the double cysteine mutant (EipB<sup>C69S+C278S</sup>) did not form an apparent  
268 dimer and was unaffected by DTT (Figure 7B). From these data, we conclude that an internal  
269 disulfide bond can form between C69 and C278 in EipB and is likely present *in vivo*, as EipB resides  
270 in the oxidizing environment of the periplasm.

271

272 To test whether this disulfide bond affects EipB function, we measured CFUs of a *Brucella ovis*  
273  $\Delta eipB$  ( $\Delta$ bov\_1121) strain expressing wild-type *B. abortus* EipB or cysteine disulfide mutants on  
274 agar plates containing 3  $\mu$ g/ml carbenicillin. *B. ovis* is a closely related biosafety level 2 (BSL2)  
275 surrogate for *B. abortus*. *B. ovis* and *B. abortus* EipB are identical with the exception of one amino  
276 acid at position 250 (Figure S4). In this carbenicillin assay (Figure 7C and D), *B. abortus* EipB  
277 complemented a *B. ovis*  $\Delta eipB$  strain, suggesting that the substitution at residue 250 does not  
278 impair EipB function. We placed four different versions of *eipB* under the control of a *lac* promoter  
279 ( $P_{lac}$ ):  $P_{lac}$ -*eipB*<sup>WT</sup>,  $P_{lac}$ -*eipB*<sup>C69S</sup>,  $P_{lac}$ -*eipB*<sup>C278S</sup>, and  $P_{lac}$ -*eipB*<sup>C69S+C278S</sup>; the empty vector was used as a  
280 control. After 5 to 6 days of growth on Schaedler Blood Agar (SBA) plates containing 3  $\mu$ g/ml of  
281 carbenicillin and no IPTG, we observed poor growth at only the lowest dilution for wild-type and  
282  $\Delta eipB$  strains carrying the empty vector control (also see Figure S7A for an example of growth on  
283 2  $\mu$ g/ml carbenicillin plates). Corresponding colonies for the strains carrying the different  $P_{lac}$ -*eipB*  
284 overexpression plasmids were more abundant though very small in the absence of IPTG induction.  
285 However, the strain harboring the wild-type *eipB* plasmid systematically grew at 1 log higher  
286 dilution than the cysteine mutant strains indicating that the presence of the disulfide bond in *eipB*  
287 contributes to carbenicillin resistance on solid medium (Figure 7C and D, see also Figure S7A).  
288 These results indicate some level of leaky expression from the multi-copy  $P_{lac}$ -*eipB* plasmids. When  
289 induced with IPTG, overexpression of the different EipB variants enhanced growth in all strains.

290 (Figure 7C and D). As expected, strains grown on control plates without carbenicillin had no growth  
291 defect, with or without IPTG induction (Figure 7D). The morphology of *B. ovis*  $\Delta eipB$  strains  
292 expressing the different variants of *eipB* appeared normal by phase contrast microscopy (see  
293 Figure S7B). These results provide evidence that EipB is necessary for full carbenicillin resistance in  
294 *B. ovis*, and that cysteines 69 and 278 contribute to EipB function *in vivo*.

295  
296 To evaluate the effect of these two cysteines on EipB stability *in vitro*, we measured the thermal  
297 stability of purified wild-type *B. abortus* EipB (EipB<sup>WT</sup>) and double cysteine mutant (EipB<sup>C69S+C278S</sup>) in  
298 presence or absence of 2 mM DTT. EipB<sup>WT</sup> melted at ~46°C in absence of DTT and at ~41.5°C in  
299 presence of DTT. EipB<sup>C69S+C278S</sup> melted at ~42.3°C in the presence or absence of DTT (see Figure  
300 S8). We conclude that an internal disulfide bond stabilizes EipB structure *in vitro*. Reduced stability  
301 of EipB lacking its conserved disulfide bond may contribute to the 1 log relative growth defect of  
302  $\Delta eipB$  strains expressing EipB cysteine mutants on SBA carbenicillin plates (Figure 7C and D).

303  
304 ***eipB* deletion is synthetically lethal with *bab1\_0430* (*ttpA*) disruption, and synthetically sick**  
305 **with disruption of multiple genes with cell envelope functions**

306 To further characterize how *eipB* functions in the *Brucella* cell, we aimed to identify transposon (Tn)  
307 insertion mutations that are synthetically lethal with *eipB* deletion in *B. abortus* (see Tables S3 and  
308 S4). In other words, we sought to discover genes that are dispensable in a wild-type genetic  
309 background, but that cannot be disrupted in a  $\Delta eipB$  background. By sequencing a Tn-Himar  
310 insertion library generated in *B. abortus*  $\Delta eipB$  (NCBI Sequence Read Archive accession  
311 SRR8322167) and a Tn-Himar library generated in wild-type *B. abortus* (NCBI Sequence Read  
312 Archive accession SRR7943723), we uncovered evidence that disruption of *bab1\_0430* (RefSeq  
313 locus BAB\_RS17965) is synthetically lethal with *eipB* deletion. Specifically, reproducible reads  
314 corresponding to insertions in the central 10-90% of *bab1\_0430* were not evident in  $\Delta eipB$ , but  
315 were present in wild-type (Figure 8A). *bab1\_0430* encodes a 621-residue tetratricopeptide repeat-  
316 containing (TPR) protein with a predicted signal peptide and signal peptidase site at its N-terminus.  
317 This protein was previously detected by mass spectrometry analyses of *B. abortus* extracts, and  
318 described as a cell-envelope associated (24), or periplasmic protein (25). Hereafter, we refer to this  
319 gene as *ttpA* (tetratricopeptide repeat protein **A**) based on its similarity to *Rhizobium*  
320 *leguminosarum* *ttpA* (12).

321  
322 Genes involved in LPS O-antigen synthesis, and previously described as synthetic lethal with *eipA*  
323 (*bab1\_1612*) deletion in *B. abortus* (8), were synthetic sick with *eipB* deletion (Figure 8A), as were  
324 genes involved in peptidoglycan synthesis: *mItA* (*bab1\_2076*, lytic murein transglycosylase A) and  
325 *bab1\_0607* (glycosyl transferase/penicillin-binding protein 1A) (26) (Figure 8A). There were  
326 reduced transposon insertions in solute binding protein *yejA1* (*bab1\_0010*) (Figure 8A), which is  
327 involved in *B. melitensis* resistance to polymyxin (27). *Int* (*bab1\_2158*) and *vtlR* (*bab1\_1517*) were  
328 also synthetic sick with  $\Delta eipB$ . *Int* is an apolipoprotein N-acyltransferase involved in lipoprotein  
329 synthesis (28); *vtlR* encodes a LysR transcriptional regulator required for full *B. abortus* virulence  
330 (29) (Figure 8A). Finally, the general stress sensor kinase *lovHK* (*bab2\_0652*) (30), *bab1\_1293*  
331 (homoserine dehydrogenase), and *bab1\_0188* (methionine synthase), had fewer Tn insertions in  
332 the  $\Delta eipB$  background relative to wild-type (Figure 8A).

333



### 334 ***ttpA* contributes to carbenicillin resistance**

335 As *ttpA* disruption is synthetic lethal with *eipB* deletion, we postulated that these two genes have  
336 complementary functions or are involved in a common physiological process (i.e. envelope  
337 integrity). Thus, to characterize *ttpA* and the nature of its connection to *eipB*, we deleted *ttpA* in  
338 *B. ovis* and evaluated its sensitivity to carbenicillin. All efforts to delete *B. ovis ttpA* (locus tag  
339 *bov\_0411*) using a classic crossover recombination and *sacB* counterselection approach were  
340 unsuccessful, though hundreds of clones were screened. Efforts to delete the chromosomal copy  
341 by expressing a copy of *ttpA* from a plasmid also failed. This result is surprising considering that  
342 transposon insertions in *B. abortus ttpA* (NCBI Sequence Read Archive accession SRR7943723) and  
343 *B. ovis ttpA* (NCBI Sequence Read Archive accession SRR7943724) are tolerated in wild-type  
344 backgrounds (8). As an alternative approach to study the function of this gene, we inactivated *ttpA*  
345 using a single crossover recombination strategy. The resulting strain expressed a truncated version  
346 of TtpA containing the first 205 amino acids (including the signal peptide), immediately followed  
347 by 22 amino acids from the suicide plasmid. The corresponding *B. ovis* strain ( $\Delta ttpA$ ) was then  
348 transformed with a plasmid-borne IPTG-inducible copy of *ttpA* (pSRK-*ttpA*) or with an empty  
349 plasmid vector (EV). We evaluated sensitivity of these strains to carbenicillin by plating a dilution  
350 series on SBA plates containing 2 or 2.5  $\mu\text{g/ml}$  carbenicillin, with or without IPTG inducer (Figure  
351 8B and C). When compared to wild-type with empty vector, *B. ovis*  $\Delta ttpA$  with empty vector had  
352  $\sim 0.5$  log reduced CFUs on carbenicillin SBA. The corresponding colonies of *B. ovis*  $\Delta ttpA$  were  
353 noticeably smaller than wild-type. Genetic complementation of  $\Delta ttpA$  with pSRK-*ttpA* restored  
354 growth on carbenicillin plates. *B. ovis*  $\Delta ttpA$ /pSRK-*ttpA* had  $\sim 1.5$  log more colonies than wild-type  
355 in the presence of carbenicillin, with or without IPTG induction. Thus, leaky expression of *ttpA* from  
356 the *lac* promoter on pSRK-*ttpA* is apparently sufficient to protect this strain from carbenicillin on  
357 solid medium. Morphology of the *B. ovis*  $\Delta ttpA$  strains appeared normal by phase contrast  
358 microscopy at 630x magnification (Figure S9).

359  
360 To further evaluate the effect of *ttpA* overexpression, we assayed *B. ovis* wild-type and  $\Delta eipB$   
361 strains carrying pSRK-*ttpA*. As before, we tested sensitivity of these inducible expression strains to  
362 carbenicillin by plating a dilution series on SBA plates containing 3  $\mu\text{g/ml}$  of carbenicillin, with or  
363 without 2 mM IPTG inducer (Figure 9A and B). Wild-type *B. ovis*/pSRK-*ttpA* and wild-type *B.*  
364 *ovis*/pSRK-*eipB* strains had equivalent CFUs in the absence of carbenicillin, with or without IPTG.  
365 *ttpA* or *eipB* provided a  $\sim 3$  log protective effect without IPTG induction in the presence of  
366 carbenicillin compared to the wild-type empty vector strain (Figure 9). Surprisingly, inducing *ttpA*  
367 expression with IPTG reduced its ability to protect in the presence of carbenicillin by 1 log (relative  
368 to uninduced), and the corresponding colonies were very small suggesting slower growth when  
369 *ttpA* was induced (Figure 9A and B). This may be an effect of IPTG, based on reduced CFU counts  
370 of wild-type empty vector control under this condition. As expected, induced expression of *eipB*  
371 from  $P_{lac}$ -*eipB* rescued the carbenicillin viability defect of  $\Delta eipB$ . However, induced expression of  
372 *ttpA* from  $P_{lac}$ -*ttpA* was not sufficient to rescue the  $\Delta eipB$  carbenicillin phenotype (Figure 9A and  
373 B). As before, we observed highly reduced CFUs for *B. ovis* wild-type or  $\Delta eipB$  control strains  
374 carrying the pSRK empty vector (EV), when challenged with 3  $\mu\text{g/ml}$  of carbenicillin. Morphology  
375 of wild-type or  $\Delta eipB$  *B. ovis* strains overexpressing *ttpA* appeared normal by phase contrast  
376 microscopy at 630x magnification (Figure S10).

377

378 The observed genetic interaction between *eipB* and *ttpA*, the fact that both single mutants have  
379 envelope phenotypes, and the fact that both gene products are secreted to the periplasm raised  
380 the possibility that EipB and TtpA physically interact. We tested interaction between EipB and TtpA  
381 proteins using bacterial two-hybrid and biochemical pull-down assays. We further evaluated  
382 whether a possible EipB-TtpA interaction is influenced by the presence or absence of the EipB  
383 internal disulfide bond using a biochemical pull-down. For our bacterial two-hybrid assay, EipB<sup>V31-  
384 K280</sup> was fused to the T25 adenylate cyclase fragment, and TtpA<sup>K31-D621</sup> was fused to the T18 or T18C  
385 adenylate cyclase fragments. For the pull-down assay, MBP-tagged TtpA (K31-D621) and His-  
386 tagged EipB (V31-K280; wild-type and the different cysteine mutants) were co-purified in presence  
387 or absence of DTT. We found no evidence for direct interaction between EipB and TtpA,  
388 suggesting that the function of these two proteins in *Brucella* envelope stress adaptation is not  
389 achieved through direct interaction (Figure S11).

390

## 391 DISCUSSION

392 Bacterial genome sequencing efforts over the past two decades have revealed thousands of  
393 protein domains of unknown function (DUFs). The DUF1849 sequence family is prevalent in orders  
394 *Rhizobiales*, *Rhodobacterales* and *Rhodospirillales*. To date, the function of DUF1849 has remained  
395 undefined. We have shown that a DUF1849 gene in *Brucella* spp., which we have named *eipB*,  
396 encodes a 14-stranded  $\beta$ -spiral protein that is secreted to the periplasm. *eipB* is required for  
397 maintenance of *B. abortus* spleen colonization in a mouse model of infection (Figure 2), and *eipB*  
398 deletion in *B. abortus* and in *B. ovis* results in sensitivity to treatments that compromise the integrity  
399 of the cell envelope *in vitro* (Figure 3). Envelope stress sensitivity of the *B. abortus*  $\Delta eipB$  mutant  
400 likely contributes to its reduced virulence in a mouse. We further demonstrate that EipB contains  
401 a conserved disulfide bond that contributes to protein stability and function *in vitro*; the importance  
402 of this conserved disulfide to EipB function *in vivo* remains to be determined (Figures 6, 7, S3 and  
403 S4)

404

### 405 *A lipoprotein connection?*

406 An x-ray crystal structure of EipB shows that this periplasmic protein adopts an unusual  $\beta$ -spiral  
407 fold that shares structural similarity (DALI Z-score= 11.0) with a functionally-uncharacterized *P.*  
408 *aeruginosa* protein, PA1994, despite low sequence identity (Figure S6). It was previously noted (23)  
409 that PA1994 has structural features that resemble the lipoprotein carrier and chaperone proteins  
410 LolA and LolB, which have a central role in lipoprotein localization in select Gram-negative bacteria  
411 (31). Like LolA, LolB, and PA1994, *Brucella* EipB forms a curved hydrophobic  $\beta$ -sheet that is  
412 wrapped around an  $\alpha$ -helix (Figure S6B). Homologs of LolA are present in *Brucella* and other  
413 *Alphaproteobacteria*, but homologs of LolB are missing (28). Given the EipB structure, its  
414 periplasmic localization, and the phenotypes of a  $\Delta eipB$  deletion strain, it is tempting to speculate  
415 that EipB (DUF1849) has a LolB-like function in the *Brucella* cell. However, it seems unlikely that  
416 LolB and EipB function in a structurally- or biochemically-equivalent manner. Certainly, we observe  
417 surface-level similarity between LolA/LolB and EipB structures (Figure S6), particularly in the  
418 antiparallel  $\beta$ -sheet region, but these proteins have topological differences that distinguish their  
419 folds. Moreover, LolB is a membrane anchored lipoprotein that facilitates lipoprotein targeting at  
420 the inner leaflet of the outer membrane. In contrast, *Brucella* EipB does not have a predicted site  
421 for lipidation (i.e. a lipobox), and is therefore unlikely to function as a membrane-anchored protein.

422

423 The number of unique barcoded Tn-Himar insertions in the apolipoprotein N-acyltransferase *Int*  
424 (*bab1\_2158*; *Int* conserved domain database score  $< e^{-173}$ ) is lower than expected in a  $\Delta eipB$   
425 background relative to wild-type (Figure 8A). This provides indirect evidence for a link between  
426 *eipB* and lipoproteins. *Int* catalyzes the final acylation step in lipoprotein biogenesis (32), which is  
427 often considered to be an essential cellular process. However, like *Francisella tularensis* and  
428 *Neisseria gonorrhoeae* (33), *B. abortus Int* is dispensable (26) (Figure 8A and Table S4). The data  
429 presented here suggest that transposon insertions are less tolerated in *B. abortus Int* when *eipB* is  
430 missing. Additional experimentation is required to test a possible functional relationship between  
431 *Int* and *eipB*. However, it is notable that we did not observe a synthetic genetic interaction between  
432 *Int* and the gene encoding a structurally-unrelated periplasmic envelope integrity protein, EipA, in  
433 a parallel Tn-seq experiment (8). Whether *eipB* actually influences lipoprotein biogenesis or  
434 localization remains to be tested.

435

436 *TtpA: a periplasmic determinant of cell envelope function in Rhizobiaceae*

437 Transposon disruption of *ttpA* (*bab1\_0430*) is not tolerated when *eipB* is deleted in *B. abortus*.  
438 *ttpA*, like *eipB*, contributes to carbenicillin resistance *in vitro* (Figures 8 and 9). Though we observed  
439 a genetic interaction between *eipB* and *ttpA*, we found no evidence for a direct physical interaction  
440 between the two periplasmic proteins encoded by these genes (Figure S11). *TtpA* is named for its  
441 tetratricopeptide repeat (TPR) motif; proteins containing TPR motifs are known to function in many  
442 different pathways in bacteria including cell envelope biogenesis, and are often molecular  
443 determinants of virulence (34, 35). Indeed, deletion of *ttpA* has been reported to attenuate *B.*  
444 *melitensis* virulence in a mouse infection model of infection (11) and to increase *R. leguminosarum*  
445 membrane permeability and sensitivity to SDS and hydrophobic antibiotics (12). A genetic  
446 interaction between *ttpA* and the complex media growth deficient (*cmdA-cmdD*) operon has been  
447 reported in *R. leguminosarum*. Mutations in this operon result in envelope dysfunction and defects  
448 in cell morphology (12, 36). While *B. abortus* contains a predicted *cmd* operon (*bab1\_1573*,  
449 *bab1\_1574*, *bab1\_1575*, and *bab1\_1576*) these genes remain uncharacterized. We found no  
450 evidence for a synthetic genetic interaction between *eipB* and *cmd* in *B. abortus*.

451

452 Leaky expression of either *eipB* or *ttpA* from a plasmid strongly protected *B. ovis* from a cell wall  
453 antibiotic (carbenicillin). Surprisingly, inducing *ttpA* expression from a plasmid with IPTG did not  
454 protect as well as uninduced (i.e. leaky) *ttpA* expression (Figure 9A and B). IPTG induction of *eipB*  
455 expression from a plasmid did not have this same parabolic effect on cell growth/survival in the  
456 face of carbenicillin treatment. Considering that EipB and TtpA confer resistance to  $\beta$ -lactam  
457 antibiotics, which perturb peptidoglycan synthesis, one might hypothesize that these proteins  
458 influence the structure or synthesis of the cell wall. This hypothesis is reinforced by the fact that a  
459 lytic murein transglycosylase and a class A PBP/glycosyl transferase are synthetic sick with *eipB*  
460 deletion (Figure 8A). In *E. coli*, the TPR-containing protein LpoA is proposed to reach from the  
461 outer membrane through the periplasm to interact with the peptidoglycan synthase PBP1A (37).  
462 Models in which EipB and TtpA influence lipoprotein biosynthesis and/or cell wall metabolism are  
463 important to test as we work toward understanding the mechanisms by which these genes ensure  
464 *Brucella* cell envelope integrity and survival in a mammalian host.

465

466

## 467 **Materials and Methods**

468 Agglutination assays, mouse and macrophage infection assays, antibody measurements, and the  
469 transposon sequencing experiments for this study were performed in parallel with our recent  
470 studies of *eipA* (8).

471

472 All experiments using live *B. abortus* 2308 were performed in Biosafety Level 3 facilities according  
473 to United States Centers for Disease Control (CDC) select agent regulations at the University of  
474 Chicago Howard Taylor Ricketts Laboratory. All the *B. abortus* and *B. ovis* strains were cultivated  
475 at 37°C with 5% CO<sub>2</sub>; primer and strain information are available in Table S5.

476

## 477 **Chromosomal deletions in *B. abortus* and in *B. ovis***

478 The *B. abortus* and *B. ovis*  $\Delta eipB$  deletion strains were generated using a double crossover  
479 recombination strategy as previously described (8). Briefly, fragments corresponding to the 500-  
480 base pair region upstream of the *eipB* start codon and the 500-base pair region downstream of  
481 the *eipB* stop codon were ligated into the suicide plasmid pNPTS138, which carries the *nptI* gene  
482 for initial kanamycin selection and the *sacB* gene for counter-selection on sucrose. Genetic  
483 complementation of the *B. abortus* deletion strain was carried out by transforming this strain with  
484 a pNPTS138 plasmid carrying the wild-type allele. The *B. ovis*  $\Delta eipB$  strain was complemented with  
485 the pSRK-*eipB* plasmid (IPTG inducible).

486

487 To inactivate *ttpA* in *B. ovis* (*bov\_0411*), a 527-nucleotide long internal fragment was cloned into  
488 pNPTS138-*cam* (a suicide plasmid that we engineered to carry a chloramphenicol resistance  
489 marker) and used to disrupt the target gene by single crossover insertion. The recombinant clones  
490 were selected on SBA plates supplemented with 3  $\mu$ g/ml chloramphenicol. The corresponding  
491 strain expresses the first 205 amino acids (including the signal peptide) of TtpA, plus 22 extra amino  
492 acids from the plasmid sequence, followed by a stop codon. This  $\Delta ttpA$  strain was complemented  
493 with pSRK-*ttpA* (kanamycin resistant).

494

## 495 ***Brucella* EipB and TtpA overexpression strains**

496 For ectopic expression of *B. ovis* TtpA and the different versions of *B. abortus* EipB (wild-type,  
497 cysteine mutants, and the EipB-PhoA<sub>Ec</sub> fusion with or without the signal peptide), the pSRKKm  
498 (Kan<sup>R</sup>) IPTG inducible plasmid was used (38). An overlapping PCR strategy was used to introduce  
499 cysteine mutations and to stitch the different DNA fragments to the *E. coli* alkaline phosphatase  
500 *phoA* (lacking its signal peptide). A Gibson-assembly cloning strategy was then used to insert the  
501 different DNA fragments in the linearized pSRK plasmid. After sequencing, plasmids were  
502 introduced in *B. abortus* or *B. ovis* by overnight mating with *E. coli* WM3064 in presence of 300  $\mu$ M  
503 of diaminopimelic acid (DAP) and plated on SBA plates supplemented with kanamycin.

504

## 505 **Building and mapping the wild-type *B. abortus* and *B. abortus* $\Delta eipB$ Tn-Himar insertion libraries**

506  
507 To build and map the different Tn-Himar insertion libraries, we used a barcoded transposon  
508 mutagenesis strategy developed by Wetmore and colleagues (39). A full and detailed protocol can  
509 be found in our previous paper (8). Statistics for the two different transposon insertion libraries are

510 reported in Table S3. For each Himar insertion library, Tn-seq read data have been deposited in  
511 the NCBI sequence read archive: *B. abortus* 2308 wild-type (BioProject PRJNA493942;  
512 SRR7943723), *B. abortus*  $\Delta eipB$  ( $\Delta bab1\_1186$ ) (BioProject PRJNA510139; SRR8322167).

513

#### 514 **Cell culture and macrophage infection assays**

515 Infection of inactivated macrophages differentiated from human monocytic THP-1 cells were  
516 performed as previously described (8). Briefly, for infection assays,  $5 \times 10^6$  *B. abortus* cells were  
517 used to infect  $5 \times 10^4$  THP-1 cells (multiplicity of infection of 1:100). To determine the numbers of  
518 intracellular bacteria at 1, 24 and 48 hours post-infection, the infected cells were lysed, the lysate  
519 was then serially diluted (10-fold serial dilution) and plated on TSA plates to enumerate CFUs.

520

#### 521 **Mouse infection assay**

522 All mouse studies were approved by the University of Chicago Institutional Animal Care and Use  
523 Committee (IACUC) and were performed as previously published (8). Briefly, 100  $\mu$ l of a  $5 \times 10^5$   
524 CFU/ml *B. abortus* suspension were intraperitoneally injected into 6-week-old female BALB/c mice  
525 (Harlan Laboratories, Inc.). At 1, 4, and 8 weeks post-infection, 5 mice per strain were sacrificed,  
526 and spleens were removed for weighing and CFU counting. At week 8, blood was also collected  
527 by cardiac-puncture and serum from each mouse was separated from blood using a serum  
528 separation tube (Sarstedt). Sera were subsequently used for Enzyme-Linked ImmunoSorbent  
529 Assays (ELISA).

530

#### 531 **Determination of antibody responses at 8 weeks post infection**

532 Total mouse serum IgG, IgG1, and IgG2a titers were measured using mouse-specific ELISA kits by  
533 following manufacturer's instructions (eBioscience). *Brucella*-specific IgG titers were determined as  
534 previously published (8).

535

#### 536 **Spleen histology**

537 At 8 weeks post infection, spleens (n= 1 per strain) were prepared for histology as previously  
538 described (8). Briefly, spleens were first fixed with formalin and submitted for tissue embedding,  
539 Hematoxylin and Eosin (H & E) staining, and immunohistochemistry to Nationwide Histology  
540 (Veradale, Washington). For immunohistochemistry, goat anti-*Brucella* IgG was used (Tetracore,  
541 Inc). Pictures of fixed mouse spleen slides were subsequently analyzed and scored.

542

543

544

#### 545 **Plate stress assays**

546 Stress assays were performed as previously published (8). Briefly, the different *B. abortus* and *B.*  
547 *ovis* strains were resuspended in sterile PBS or Brucella broth to an  $OD_{600}$  of  $\sim 0.015$  ( $\sim 1 \times 10^8$   
548 CFU/ml) and serially diluted (10-fold serial dilution). 5  $\mu$ l of each dilution were then spotted on TSA  
549 or SBA plates containing the different membrane stressors (2 to 5  $\mu$ g/ml of ampicillin or  
550 carbenicillin, 200  $\mu$ g/ml of deoxycholate or 2 mM EDTA final concentration).

551

552 To grow *B. ovis* strains containing pSRK-derived plasmids, all liquid cultures and plates were  
553 supplemented with 50  $\mu$ g/ml kanamycin. When necessary, 2 mM IPTG (final concentration) was

554 added to the plates to induce expression of EipB or TtpA from pSRK. We note that the *B. ovis*  
555  $\Delta ttpA$  strains carry the pNPTS138 suicide plasmid (used for gene disruption) which results in  
556 chloramphenicol resistance. However, no chloramphenicol was added to the overnight cultures or  
557 the stress plates. For carbenicillin growth/survival assays, *B. ovis* strains were grown for 3 days at  
558 37°C / 5% CO<sub>2</sub> on SBA plates without carbenicillin, and for 5 to 6 days when these plates contained  
559 2, 2.5 or 3 µg/ml of carbenicillin.

560

### 561 **Cryo-electron microscopy**

562 Cryo-electron microscopy was performed as previously described (8). Briefly, *B. abortus* cultures in  
563 Brucella broth (OD<sub>600</sub> of ~0.015) were prepared with 2 mM EDTA or ampicillin (5 µg/ml) (final  
564 concentrations). After 4 hours of incubation in the presence of EDTA or ampicillin, cells were  
565 harvested and fixed in PBS + 4% formaldehyde. After 1 hour, cells were pelleted and resuspended  
566 in 500 µl EM buffer (40). Per CDC guidelines, cell killing was confirmed before sample removal for  
567 imaging. Fixed *Brucella* cells were vitrified on glow-discharged 200 mesh copper EM-grids with  
568 extra thick R2/2 holey carbon film (Quantifoil). Per grid, 3 µl of the sample was applied and  
569 automatically blotted and plunged into liquid ethane with the Leica EM GP plunge-freezer. Images  
570 were collected on a Talos L120C TEM (Thermo Fischer) using the Gatan cryo-TEM (626) holder.  
571 The images were acquired at a defocus between 8-10 µm, with a pixel size of 0.458 nm.

572

### 573 **Light microscopy images**

574 Phase-contrast images of *B. abortus* and *B. ovis* cells from plates or liquid broth (plus or minus 1  
575 mM IPTG) were collected using a Leica DM 5000B microscope with an HCX PL APO 63×/1.4 NA  
576 Ph3 objective. Images were acquired with a mounted Orca-ER digital camera (Hamamatsu)  
577 controlled by the Image-Pro software suite (Media Cybernetics). To prepare the different samples,  
578 cells were resuspended in PBS containing 4% formaldehyde.

579

### 580 **Agglutination assay**

581 Agglutination assays were performed as previously described (8). The different *Brucella* strains (*B.*  
582 *ovis* and *B. abortus*) were harvested and resuspended in sterile PBS at OD<sub>600</sub> ~ 0.5. One milliliter of  
583 each cell suspension was loaded in a spectrophotometer cuvette and mixed with 20 µl of wild-type  
584 *B. abortus*-infected mouse serum or with acriflavine (final concentration 5 mM) and OD was  
585 measured at 600 nm at time "0" and after 2 hours. As a control, 1 ml of each cell suspension was  
586 also kept in a spectrophotometer cuvette without serum or acriflavine.

587

### 588 **Alkaline phosphatase cell localization assay**

589 To determine the cellular localization of EipB, we used a *B. ovis* strain transformed with the pSRK  
590 plasmid carrying *B. abortus eipB* C-terminally fused to *E. coli phoA*. Two versions of this plasmid  
591 were built: one carrying the full-length *eipB*, which expressed the protein with its signal peptide,  
592 and one carrying a short version of *eipB*, which expressed the protein lacking the signal peptide.  
593 Alkaline phosphatase assays were performed as previously described (8). Briefly, aliquots of  
594 overnight culture of *B. ovis* (grown in presence or absence of 1 mM IPTG) were mixed with 5-  
595 Bromo-4-chloro-3-indolyl phosphate (BCIP, final concentration 200 µM). After 2 hours of  
596 incubation, the color change was visually assessed and pictures were taken. The same experiment  
597 was performed with spent medium supernatants.

598

### 599 **Size exclusion chromatography**

600 A DNA fragment corresponding to *B. abortus eipB* lacking the signal peptide (residues 31 - 280)  
601 was cloned into pET28a and transformed into the protein overexpression *E. coli* Rosetta (DE3)  
602 *pLysS* strain. Protein expression and purification was conducted using a Ni<sup>2+</sup> affinity purification  
603 protocol as previously published (8). The purified protein was then dialyzed against a Tris-NaCl  
604 buffer (10 mM Tris (pH 7.4), 150 mM NaCl). EipB oligomeric state was analyzed by size exclusion  
605 chromatography as previously described (8). Briefly, after concentration, a protein sample (500  $\mu$ l  
606 at 5 mg/ml) was injected onto a GE Healthcare Superdex 200 10/300 GL column (flow rate: 0.5  
607 ml/min). Elution profile was measured at 280 nm and 500  $\mu$ l fractions were collected during the  
608 run; the dialysis buffer described above was used for all runs. Protein standards (blue dextran /  
609 aldolase / conalbumin / ovalbumin) injected onto the column were used to construct a calibration  
610 curve to estimate the molecular weight of purified EipB.

611

### 612 **EipB expression, purification and crystallization**

613 The DNA fragment corresponding to the *B. abortus* EipB protein (residues 31 - 280) was cloned  
614 into the pMCSG68 plasmid using a protocol previously published (8). For protein expression, an *E.*  
615 *coli* BL21-Gold(DE3) strain was used. Selenomethionine (Se-Met) protein expression and  
616 purification was performed as previously described (8). The purified protein was then dialyzed  
617 against 20 mM HEPES (pH 8), 250 mM NaCl, and 2 mM DTT buffer and its concentration was  
618 determined. The purified Se-Met EipB protein was concentrated to 160 mg/ml for crystallization.  
619 Initial crystallization screening was carried out using the sitting-drop, vapor-diffusion technique.  
620 After a week, EipB crystallized in the triclinic space group P1 from the condition #70 (F10) of the  
621 MCSG-2 crystallization kit, which contains 24% PEG1500 and 20% glycerol. Prior to flash freezing  
622 in liquid nitrogen, crystals were cryo-protected by briefly washing them in the crystallization  
623 solution containing 25% glycerol.

624

### 625 **Crystallographic data collection and data processing**

626 Se-Met crystal diffraction was measured at a temperature of 100 K using a 2-second  
627 exposure/degree of rotation over 260°. Crystals diffracted to a resolution of 2.1 Å and the  
628 corresponding diffraction images were collected on the ADSC Q315r detector with an X-ray  
629 wavelength near the selenium edge of 12.66 keV (0.97929 Å) for SAD phasing at the 19-ID  
630 beamline (SBC-CAT, Advanced Photon Source, Argonne, Illinois). Diffraction data were processed  
631 using the HKL3000 suite (41). *B. abortus* EipB crystals were twinned and the data had to be  
632 reprocessed and scaled from the P2<sub>1</sub> space group to the lower symmetry space group P1 with the  
633 following cell dimensions: a= 47.36 Å, b= 69.24 Å, c= 83.24 Å, and  $\alpha$ = 90.09°,  $\beta$ = 90.02°,  $\gamma$ = 78.66°  
634 (see Table S2). The structure was determined by SAD phasing using SHELX C/D/E, mlphare, and  
635 dm, and initial automatic protein model building with Buccaneer software, all implemented in the  
636 HKL3000 software package (41). The initial model was manually adjusted using COOT (42) and  
637 iteratively refined using COOT, PHENIX (43), and REFMAC (44); 5% of the total reflections was  
638 kept out of the refinement in both REFMAC and PHENIX throughout the refinement. The final  
639 structure converged to an R<sub>work</sub> of 19.5% and R<sub>free</sub> of 24.5% and includes four protein chains (A: 30-  
640 270, B: 31-271, C: 30-271, and D: 30-270), 9 ethylene glycol molecules, two glycerol molecules,  
641 and 129 ordered water molecules. The EipB protein contained three N-terminal residues (Ser-Asn-

642 Ala) that remain from the cleaved tag. The stereochemistry of the structure was checked using  
643 PROCHECK (45), and the Ramachandran plot and was validated using the PDB validation server.  
644 Coordinates of EipB have been deposited in the PDB (PDB ID: 6NTR). Crystallographic data and  
645 refined model statistics are presented in Table S2. Diffraction images have been uploaded to the  
646 SBGrid diffraction data server (Data DOI: 10.15785/SBGRID/445).

647

#### 648 **Disulfide bond reduction assays**

649 DNA fragments corresponding to *B. abortus eipB* cysteine mutants (C69S, C278S, and  
650 C69S+C278S) and lacking the signal peptide (residues M1-A30) were cloned into pET28a and  
651 transformed into the protein overexpression *E. coli* Rosetta (DE3) *pLysS* strain. Protein expression  
652 and Ni<sup>2+</sup> affinity purification were conducted using protocols previously published (8). Briefly, for  
653 each protein, a pellet corresponding to a 250 ml culture was resuspended in 1.5 ml of BugBuster  
654 Master Mix (MD Millipore) supplemented with 50  $\mu$ l of DNase I (5mg/ml). After 20 min on ice, cell  
655 debris was pelleted and the supernatant was mixed with 200  $\mu$ l of Ni-NTA Superflow resin (Qiagen).  
656 Beads were washed with 8 ml of a 10 mM imidazole Tris-NaCl buffer (10 mM Tris (pH 7.4), 150 mM  
657 NaCl) and 5 ml of a 75 mM imidazole Tris-NaCl buffer. Proteins were eluted with 200  $\mu$ l of a 500  
658 mM imidazole Tris-NaCl buffer. 50  $\mu$ l of each purified protein (at 0.5 mg/ml) were then mixed with  
659 12.5  $\mu$ l of a 4x protein loading dye containing or not 1 mM of DTT. Samples were boiled for 5 min  
660 and 10  $\mu$ l were loaded on a 12% SDS-PAGE.

661

#### 662 **Thermal shift protein stability assay**

663 A thermal shift assay to assess protein stability was performed on 20  $\mu$ l samples containing 25  $\mu$ M  
664 of purified *B. abortus* EipB<sup>WT</sup> or EipB<sup>C69S+C278S</sup>, 50x Sypro Orange (Invitrogen) and 2 mM DTT when  
665 needed. Each protein sample and solution was prepared with the same dialysis buffer (10 mM Tris  
666 (pH 7.4), 150 mM NaCl, 1 mM EDTA). Ninety-six-well plates (MicroAmp EnduratePlate Optical 96-  
667 well fast clear reaction plates; Applied Biosystems) were used and heated from 25 to 95°C with a  
668 ramp rate of 0.05°C/s and read by a thermocycler (QuantumStudio 5 real-time PCR system; Applied  
669 Biosystems - Thermo Fisher Scientific) using excitation and emission wavelengths of 470  $\pm$  15 nm  
670 and 558  $\pm$  11 nm, respectively. Protein Thermal Shift software v1.3 (Applied Biosystems - Thermo  
671 Fisher Scientific) was used for calculation of the first derivative of the curve to determine the  
672 melting temperature.

673

674

#### 675 **Bacterial two-hybrid protein interaction assay**

676 To assay EipB interaction with TtpA, we used a bacterial two-hybrid system (46). Briefly, a *B. abortus*  
677 *eipB* DNA fragment (lacking the signal peptide) was cloned into pKT25 vector and a *B. abortus*  
678 *ttpA* fragment (lacking the signal peptide) was cloned into pUT18 or pUT18C vectors. The different  
679 pUT18, pUT18C and pKT25 combinations were then co-transformed into a chemically competent  
680 *E. coli* reporter strain BTH101 and spotted on LB agar plates (ampicillin 100  $\mu$ g/ml + kanamycin 50  
681  $\mu$ g/ml) supplemented with X-Gal (40  $\mu$ g/ml).

682

#### 683 **Pull-down assay between EipB and TtpA**

684 To evaluate the interaction between *B. abortus* wild-type and cysteine mutant EipB and TtpA, the  
685 different genes were cloned into pET28a and pMAL-c2G expression plasmids and transformed in



686 *E. coli* Rosetta (DE3) *pLysS* expression strain. The corresponding proteins (His<sub>6</sub>-EipB<sup>WT</sup> or His<sub>6</sub>-EipB  
687 cysteine mutants, and MBP-TtpA) were overexpressed and purified using nickel affinity and  
688 amylose affinity gravity columns, respectively. Two milliliters of amylose resin were saturated with  
689 10 ml of a clarified cell lysate corresponding to a 500 ml culture pellet of IPTG induced Rosetta  
690 pMAL-c2G-*ttpA*. Beads were thoroughly washed with 50 ml of a Tris-NaCl buffer (10 mM Tris (pH  
691 7.4), 150 mM NaCl) and 200 µl of these beads were mixed with 500 µl of nickel purified EipB at  
692 ~0.5 mg/ml (see reference (8) for a detailed nickel-affinity purification protocol). After 30 min  
693 incubation in presence or absence of 1 mM DTT, the flow-through was saved and the beads were  
694 thoroughly washed with a Tris-NaCl buffer supplemented or not with 1 mM DTT. The protein was  
695 eluted with 200 µl of the same buffer containing 20 mM of maltose. The different protein samples  
696 (elutions and flow-throughs) were run on a 12% SDS-PAGE and Coomassie stained.

697

### 698 **Bioinformatics**

699 Figures of the structures, structural alignments, electrostatic potential representations and root  
700 mean square deviation (rmsd) calculations were performed using PyMOL (PyMOL Molecular  
701 Graphics System, version 1.7.4; Schrödinger, LLC). Surface hydrophobicity was evaluated using the  
702 YRB python script (47). The XtalPred server (48) and Dali server (49) were used to identify proteins  
703 with the highest structural and sequence relatedness. The BLAST server  
704 (<https://blast.ncbi.nlm.nih.gov/Blast.cgi>) was used to identify homologs of *B. abortus* EipB in  
705 different taxa within the *Alphaproteobacteria*. The EipB weblogo was generated by aligning 447  
706 DUF1849 protein sequences of *Alphaproteobacteria* retrieved from the EMBL-EBI website  
707 (<https://www.ebi.ac.uk/interpro/entry/IPR015000/proteins-matched>). Alignment was generated  
708 with Clustal Omega (<https://www.ebi.ac.uk/Tools/msa/clustalo/>). When necessary, the C-terminus  
709 of sequences were realigned by hand. The Clustal alignment file was converted to a fasta file using  
710 [http://sequenceconversion.bugaco.com/converter/biology/sequences/clustal\\_to\\_fasta.php](http://sequenceconversion.bugaco.com/converter/biology/sequences/clustal_to_fasta.php). This  
711 file was then submitted to skylign server (<http://skylign.org/>) to generate a weblogo. The alignment  
712 was processed with the following options: remove mostly-empty columns / alignment sequences  
713 are full length / score.

714

### 715 **Acknowledgments**

716 We thank the members of the Crosson laboratory for helpful discussions. The authors wish to thank  
717 members of the SBC at Argonne National Laboratory for their help with data collection at the 19-  
718 ID beamline. This work was supported by National Institutes of Health Grants U19AI107792 and  
719 R01AI107159 to S.C.

720

### 721 **Author contributions**

722 JH, JWW and SC contributed to the design and conceptualization of the study; JH, JWW, AF,  
723 DMC, JXC, EU, AB, LB, GB, YK and SC performed the experiments, acquired and analyzed the  
724 data; JH, JWW, AF and SC interpreted the data; JH and SC wrote the original draft of the  
725 manuscript.

726

727 **References**

728

- 729 1. **Gorvel JP, Moreno E.** 2002. *Brucella* intracellular life: from invasion to intracellular  
730 replication. *Vet Microbiol* **90**:281-297.
- 731 2. **Pappas G, Papadimitriou P, Akritidis N, Christou L, Tsianos EV.** 2006. The new global  
732 map of human *brucellosis*. *Lancet Infect Dis* **6**:91-99.
- 733 3. **Batut J, Andersson SG, O'Callaghan D.** 2004. The evolution of chronic infection strategies  
734 in the alpha-proteobacteria. *Nat Rev Microbiol* **2**:933-945.
- 735 4. **Atluri VL, Xavier MN, de Jong MF, den Hartigh AB, Tsolis RM.** 2011. Interactions of the  
736 human pathogenic *Brucella* species with their hosts. *Annu Rev Microbiol* **65**:523-541.
- 737 5. **Roop RM, 2nd, Gaines JM, Anderson ES, Caswell CC, Martin DW.** 2009. Survival of the  
738 fittest: how *Brucella* strains adapt to their intracellular niche in the host. *Med Microbiol*  
739 *Immunol* **198**:221-238.
- 740 6. **Byndloss MX, Tsolis RM.** 2016. *Brucella* spp. virulence factors and immunity. *Annu Rev*  
741 *Anim Biosci* **4**:111-127.
- 742 7. **Lamontagne J, Butler H, Chaves-Olarte E, Hunter J, Schirm M, Paquet C, Tian M,**  
743 **Kearney P, Hamaidi L, Chelsky D, Moriyon I, Moreno E, Paramithiotis E.** 2007. Extensive  
744 cell envelope modulation is associated with virulence in *Brucella abortus*. *J Proteome Res*  
745 **6**:1519-1529.
- 746 8. **Herrou J, Willett JW, Fiebig A, Varesio LM, Czyz DM, Cheng JX, Ultee E, Briegel A,**  
747 **Bigelow L, Babnigg G, Kim Y, Crosson S.** 2018. Periplasmic protein EipA determines  
748 envelope stress resistance and virulence in *Brucella abortus*. *Mol Microbiol*  
749 doi:10.1111/mmi.14178.
- 750 9. **Finn RD, Coghill P, Eberhardt RY, Eddy SR, Mistry J, Mitchell AL, Potter SC, Punta M,**  
751 **Qureshi M, Sangrador-Vegas A, Salazar GA, Tate J, Bateman A.** 2016. The Pfam protein  
752 families database: towards a more sustainable future. *Nucleic Acids Res* **44**:D279-285.
- 753 10. **Price MN, Wetmore KM, Waters RJ, Callaghan M, Ray J, Liu H, Kuehl JV, Melnyk RA,**  
754 **Lamson JS, Suh Y, Carlson HK, Esquivel Z, Sadeeshkumar H, Chakraborty R, Zane GM,**  
755 **Rubin BE, Wall JD, Visel A, Bristow J, Blow MJ, Arkin AP, Deutschbauer AM.** 2018.  
756 Mutant phenotypes for thousands of bacterial genes of unknown function. *Nature* **557**:503-  
757 509.
- 758 11. **Lestrade P, Dricot A, Delrue RM, Lambert C, Martinelli V, De Bolle X, Letesson JJ, Tibor**  
759 **A.** 2003. Attenuated signature-tagged mutagenesis mutants of *Brucella melitensis*  
760 identified during the acute phase of infection in mice. *Infect Immun* **71**:7053-7060.
- 761 12. **Neudorf KD, Vanderlinde EM, Tambalo DD, Yost CK.** 2015. A previously uncharacterized  
762 tetratricopeptide-repeat-containing protein is involved in cell envelope function in  
763 *Rhizobium leguminosarum*. *Microbiology* **161**:148-157.
- 764 13. **Street NE, Schumacher JH, Fong TA, Bass H, Fiorentino DF, Leverah JA, Mosmann TR.**  
765 1990. Heterogeneity of mouse helper T cells. Evidence from bulk cultures and limiting  
766 dilution cloning for precursors of Th1 and Th2 cells. *J Immunol* **144**:1629-1639.
- 767 14. **Svetic A, Jian YC, Lu P, Finkelman FD, Gause WC.** 1993. *Brucella abortus* induces a novel  
768 cytokine gene expression pattern characterized by elevated IL-10 and IFN-gamma in CD4+  
769 T cells. *Int Immunol* **5**:877-883.

- 770 15. **Lapaque N, Moriyon I, Moreno E, Gorvel JP.** 2005. *Brucella* lipopolysaccharide acts as a  
771 virulence factor. *Curr Opin Microbiol* **8**:60-66.
- 772 16. **Papo N, Shai Y.** 2005. A molecular mechanism for lipopolysaccharide protection of Gram-  
773 negative bacteria from antimicrobial peptides. *J Biol Chem* **280**:10378-10387.
- 774 17. **Palmer DA, Douglas JT.** 1989. Analysis of *Brucella* lipopolysaccharide with specific and  
775 cross-reacting monoclonal antibodies. *J Clin Microbiol* **27**:2331-2337.
- 776 18. **Alton GG, Jones LM, Pietz DE.** 1975. Laboratory techniques in *brucellosis*. Monogr Ser  
777 World Health Organ:1-163.
- 778 19. **Turse JE, Pei J, Ficht TA.** 2011. Lipopolysaccharide-deficient *Brucella* variants arise  
779 spontaneously during infection. *Front Microbiol* **2**:54.
- 780 20. **Nielsen H.** 2017. Predicting secretory proteins with SignalP. *Methods Mol Biol* **1611**:59-73.
- 781 21. **Marrichi M, Camacho L, Russell DG, DeLisa MP.** 2008. Genetic toggling of alkaline  
782 phosphatase folding reveals signal peptides for all major modes of transport across the  
783 inner membrane of bacteria. *J Biol Chem* **283**:35223-35235.
- 784 22. **Holm L, Laakso LM.** 2016. Dali server update. *Nucleic Acids Res* **44**:W351-355.
- 785 23. **Bakolitsa C, Kumar A, McMullan D, Krishna SS, Miller MD, Carlton D, Najmanovich R,**  
786 **Abdubek P, Astakhova T, Chiu HJ, Clayton T, Deller MC, Duan L, Elias Y, Feuerhelm J,**  
787 **Grant JC, Grzechnik SK, Han GW, Jaroszewski L, Jin KK, Klock HE, Knuth MW, Kozbial**  
788 **P, Marciano D, Morse AT, Nigoghossian E, Okach L, Oommachen S, Paulsen J, Reyes R,**  
789 **Rife CL, Trout CV, van den Bedem H, Weekes D, White A, Xu Q, Hodgson KO, Wooley**  
790 **J, Elsliger MA, Deacon AM, Godzik A, Lesley SA, Wilson IA.** 2010. The structure of the  
791 first representative of Pfam family PF06475 reveals a new fold with possible involvement in  
792 glycolipid metabolism. *Acta Crystallogr Sect F Struct Biol Cryst Commun* **66**:1211-1217.
- 793 24. **Marchesini MI, Connolly J, Delpino MV, Baldi PC, Mujer CV, DelVecchio VG, Comerci**  
794 **DJ.** 2011. *Brucella abortus* choloylglycine hydrolase affects cell envelope composition and  
795 host cell internalization. *PLoS One* **6**:e28480.
- 796 25. **Connolly JP, Comerci D, Alefantis TG, Walz A, Quan M, Chafin R, Grewal P, Mujer CV,**  
797 **Ugalde RA, DelVecchio VG.** 2006. Proteomic analysis of *Brucella abortus* cell envelope and  
798 identification of immunogenic candidate proteins for vaccine development. *Proteomics*  
799 **6**:3767-3780.
- 800 26. **Sternon JF, Godessart P, Goncalves de Freitas R, Van der Henst M, Poncin K, Francis N,**  
801 **Willemart K, Christen M, Christen B, Letesson JJ, De Bolle X.** 2018. Transposon  
802 sequencing of *Brucella abortus* uncovers essential genes for growth in vitro and inside  
803 macrophages. *Infect Immun* **86**:e00312-00318.
- 804 27. **Wang Z, Bie P, Cheng J, Lu L, Cui B, Wu Q.** 2016. The ABC transporter YejABEF is required  
805 for resistance to antimicrobial peptides and the virulence of *Brucella melitensis*. *Sci Rep*  
806 **6**:31876.
- 807 28. **Goolab S, Roth RL, van Heerden H, Crampton MC.** 2015. Analyzing the molecular  
808 mechanism of lipoprotein localization in *Brucella*. *Front Microbiol* **6**:1189.
- 809 29. **Sheehan LM, Budnick JA, Blanchard C, Dunman PM, Caswell CC.** 2015. A LysR-family  
810 transcriptional regulator required for virulence in *Brucella abortus* is highly conserved  
811 among the alpha-proteobacteria. *Mol Microbiol* **98**:318-328.

- 812 30. **Kim HS, Willett JW, Jain-Gupta N, Fiebig A, Crosson S.** 2014. The *Brucella abortus*  
813 virulence regulator, LovhK, is a sensor kinase in the general stress response signalling  
814 pathway. *Mol Microbiol* **94**:913-925.
- 815 31. **Silhavy TJ, Kahne D, Walker S.** 2010. The bacterial cell envelope. *Cold Spring Harb*  
816 *Perspect Biol* **2**:a000414.
- 817 32. **Okuda S, Tokuda H.** 2011. Lipoprotein sorting in bacteria. *Annu Rev Microbiol* **65**:239-259.
- 818 33. **LoVullo ED, Wright LF, Isabella V, Huntley JF, Pavelka MS, Jr.** 2015. Revisiting the Gram-  
819 negative lipoprotein paradigm. *J Bacteriol* **197**:1705-1715.
- 820 34. **Zeytuni N, Zarivach R.** 2012. Structural and functional discussion of the tetra-trico-peptide  
821 repeat, a protein interaction module. *Structure* **20**:397-405.
- 822 35. **Cerveny L, Straskova A, Dankova V, Hartlova A, Ceckova M, Staud F, Stulik J.** 2013.  
823 Tetratricopeptide repeat motifs in the world of bacterial pathogens: role in virulence  
824 mechanisms. *Infect Immun* **81**:629-635.
- 825 36. **Vanderlinde EM, Magnus SA, Tambalo DD, Koval SF, Yost CK.** 2011. Mutation of a  
826 broadly conserved operon (RL3499-RL3502) from *Rhizobium leguminosarum* biovar *viciae*  
827 causes defects in cell morphology and envelope integrity. *J Bacteriol* **193**:2684-2694.
- 828 37. **Jean NL, Bougault CM, Lodge A, Derouaux A, Callens G, Egan AJ, Ayala I, Lewis RJ,**  
829 **Vollmer W, Simorre JP.** 2014. Elongated structure of the outer-membrane activator of  
830 peptidoglycan synthesis LpoA: implications for PBP1A stimulation. *Structure* **22**:1047-1054.
- 831 38. **Khan SR, Gaines J, Roop RM, 2nd, Farrand SK.** 2008. Broad-host-range expression vectors  
832 with tightly regulated promoters and their use to examine the influence of TraR and TraM  
833 expression on Ti plasmid quorum sensing. *Appl Environ Microbiol* **74**:5053-5062.
- 834 39. **Wetmore KM, Price MN, Waters RJ, Lamson JS, He J, Hoover CA, Blow MJ, Bristow J,**  
835 **Butland G, Arkin AP, Deutschbauer A.** 2015. Rapid quantification of mutant fitness in  
836 diverse bacteria by sequencing randomly bar-coded transposons. *MBio* **6**:e00306-00315.
- 837 40. **Willett JW, Herrou J, Briegel A, Rotskoff G, Crosson S.** 2015. Structural asymmetry in a  
838 conserved signaling system that regulates division, replication, and virulence of an  
839 intracellular pathogen. *Proc Natl Acad Sci U S A* **112**:E3709-3718.
- 840 41. **Minor W, Cymborowski M, Otwinowski Z, Chruszcz M.** 2006. HKL-3000: the integration  
841 of data reduction and structure solution - from diffraction images to an initial model in  
842 minutes. *Acta Crystallogr D Biol Crystallogr* **62**:859-866.
- 843 42. **Emsley P, Cowtan K.** 2004. Coot: model-building tools for molecular graphics. *Acta*  
844 *Crystallogr D Biol Crystallogr* **60**:2126-2132.
- 845 43. **Adams PD, Grosse-Kunstleve RW, Hung LW, Ioerger TR, McCoy AJ, Moriarty NW, Read**  
846 **RJ, Sacchettini JC, Sauter NK, Terwilliger TC.** 2002. PHENIX: building new software for  
847 automated crystallographic structure determination. *Acta Crystallogr D Biol Crystallogr*  
848 **58**:1948-1954.
- 849 44. **Murshudov GN, Vagin AA, Dodson EJ.** 1997. Refinement of macromolecular structures by  
850 the maximum-likelihood method. *Acta Crystallogr D Biol Crystallogr* **53**:240-255.
- 851 45. **Laskowski RA, Macarthur MW, Moss DS, Thornton JM.** 1993. Procheck - a program to  
852 check the stereochemical quality of protein structures. *J Appl Crystallogr* **26**:283-291.
- 853 46. **Karimova G, Pidoux J, Ullmann A, Ladant D.** 1998. A bacterial two-hybrid system based  
854 on a reconstituted signal transduction pathway. *Proc Natl Acad Sci U S A* **95**:5752-5756.

- 855 47. **Hagemans D, van Belzen IA, Moran Luengo T, Rudiger SG.** 2015. A script to highlight  
856 hydrophobicity and charge on protein surfaces. *Front Mol Biosci* **2**:56.
- 857 48. **Slabinski L, Jaroszewski L, Rychlewski L, Wilson IA, Lesley SA, Godzik A.** 2007. XtalPred:  
858 a web server for prediction of protein crystallizability. *Bioinformatics* **23**:3403-3405.
- 859 49. **Holm L, Rosenstrom P.** 2010. Dali server: conservation mapping in 3D. *Nucleic Acids Res*  
860 **38**:W545-549.
- 861 50. **Williams KP, Sobral BW, Dickerman AW.** 2007. A robust species tree for the  
862 *Alphaproteobacteria*. *J Bacteriol* **189**:4578-4586.  
863  
864

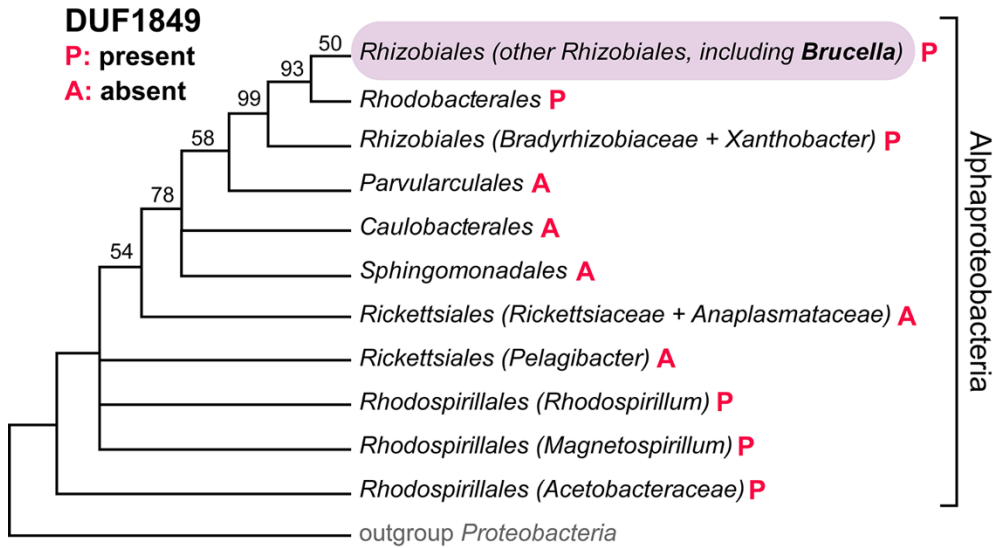

865  
866 **Figure 1:** The DUF1849 sequence family is restricted to *Alphaproteobacteria*. Bayesian  
867 phylogenetic tree showing the distribution of DUF1849 genes in different orders within the class  
868 *Alphaproteobacteria* (P: present, A: absent). Bayesian support values are shown when <100%;  
869 nodes were collapsed when support was <50%; adapted from Williams and colleagues (50). In  
870 *Brucella abortus* (order *Rhizobiales*), DUF1849 is encoded by gene locus *bab1\_1186* (i.e. *eipB*).  
871

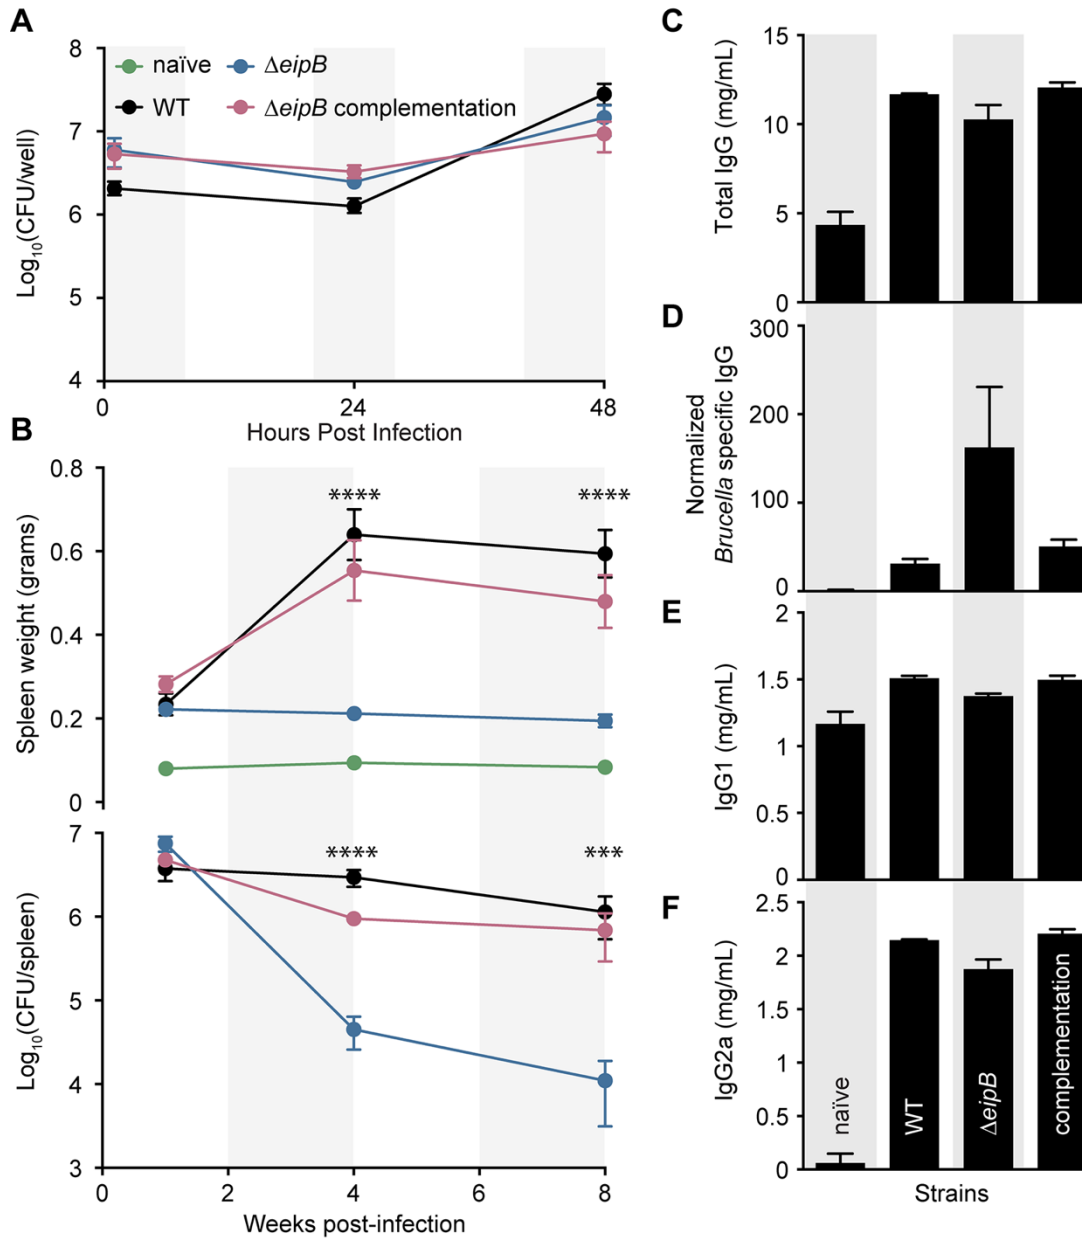

872  
873

874 **Figure 2:** *eipB* is a genetic determinant of *B. abortus* virulence. A) *In vitro* macrophage infection  
875 assay: infection of THP-1 cells with wild-type *B. abortus* 2308 (black line),  $\Delta eipB$  (blue line) and the  
876 *eipB* complementation strain (pink line). The number of *B. abortus* CFUs recovered from the THP-  
877 1 cells at 1, 24, and 48 hours post infection is plotted. Each data point (n= 3 per strain) is the mean  
878  $\pm$  the standard error of the mean. B) *In vivo* mouse infection assay: female BALB/c mice were  
879 injected intraperitoneally with wild-type,  $\Delta eipB$ , or  $\Delta eipB$ -complementation strains. Spleen weights  
880 (upper graph) and bacterial burden (lower graph) were measured at 1, 4, and 8 weeks post-  
881 infection. Graphs represent data from uninfected, naïve mice (in green) or mice infected with wild-  
882 type (black),  $\Delta eipB$  (blue), or complementation (pink) strains. Data presented are the mean  $\pm$  the  
883 standard error of the mean; n= 5 mice per strain per time point. One-way ANOVA followed by  
884 Dunnett's post test (to wild-type) supports the conclusion that spleens infected with the *eipB*  
885 deletion strain were significantly smaller at 4 (\*\*\*\*, p<0.0001) and 8 weeks (\*\*\*\*, p<0.0001) and

886 had fewer CFU than wild-type at 4 (\*\*\*\*,  $p < 0.0001$ ) and 8 weeks (\*\*\*,  $p < 0.0007$ ). C-F) Antibody  
887 quantification in mouse serum harvested at 8 weeks post-infection from naïve control mice or mice  
888 infected with wild-type,  $\Delta eipB$ , or complementation strains. Amounts of total IgG at 8 weeks (C),  
889 *Brucella*-specific IgG (D), IgG1 (E), and IgG2a (F) were determined by ELISA. Each data point (naïve:  
890  $n = 3$ , WT:  $n = 2$ ,  $\Delta eipB$  and complementation:  $n = 4$ ) is the mean  $\pm$  the standard error of the mean.  
891



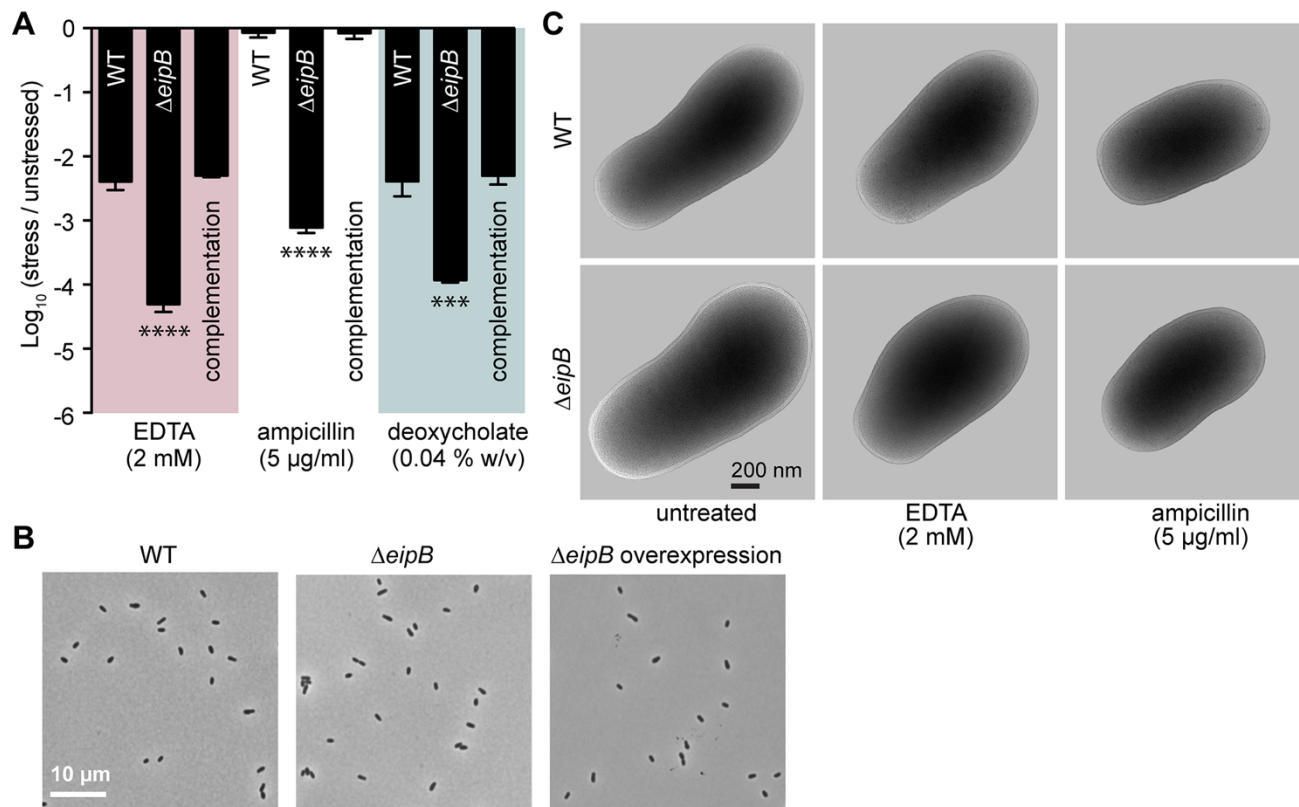

892  
893

894 **Figure 3:** Assessing the effect of cell envelope stressors on *B. abortus*  $\Delta eipB$  growth and survival.  
 895 A) Envelope stress survival assays. Serially diluted cultures of *B. abortus* wild-type,  $\Delta eipB$ , and  
 896 complementation strains were spotted on plain TSA plates or TSA plates containing EDTA (2 mM),  
 897 deoxycholate (0.04% w/v), or ampicillin (5  $\mu$ g/ml). After 3 to 5 days of growth at 37°C / 5% CO<sub>2</sub>,  
 898 CFUs for each condition were enumerated and plotted. This experiment was repeated four times;  
 899 each data point is the mean  $\pm$  the standard error of the mean. One-way ANOVA followed by  
 900 Dunnett's post test (to wild-type) supports the conclusion that the *eipB* deletion strain had  
 901 significantly fewer CFU than wild-type in presence of EDTA (\*\*\*\*,  $p < 0.0001$ ), ampicillin (\*\*\*\*,  
 902  $p < 0.0001$ ), and deoxycholate (\*\*\*,  $p < 0.0003$ ). B) Light micrograph of *B. abortus* wild-type (left),  
 903  $\Delta eipB$  (middle) and overexpression (right; induced with 5 mM IPTG) liquid cultures grown overnight  
 904 in Brucella broth. C) CryoEM images of *B. abortus* wild-type and  $\Delta eipB$  cells cultivated in liquid  
 905 broth that either remained untreated or were treated with 2 mM EDTA or 5  $\mu$ g/ml ampicillin for 4  
 906 hours.  
 907

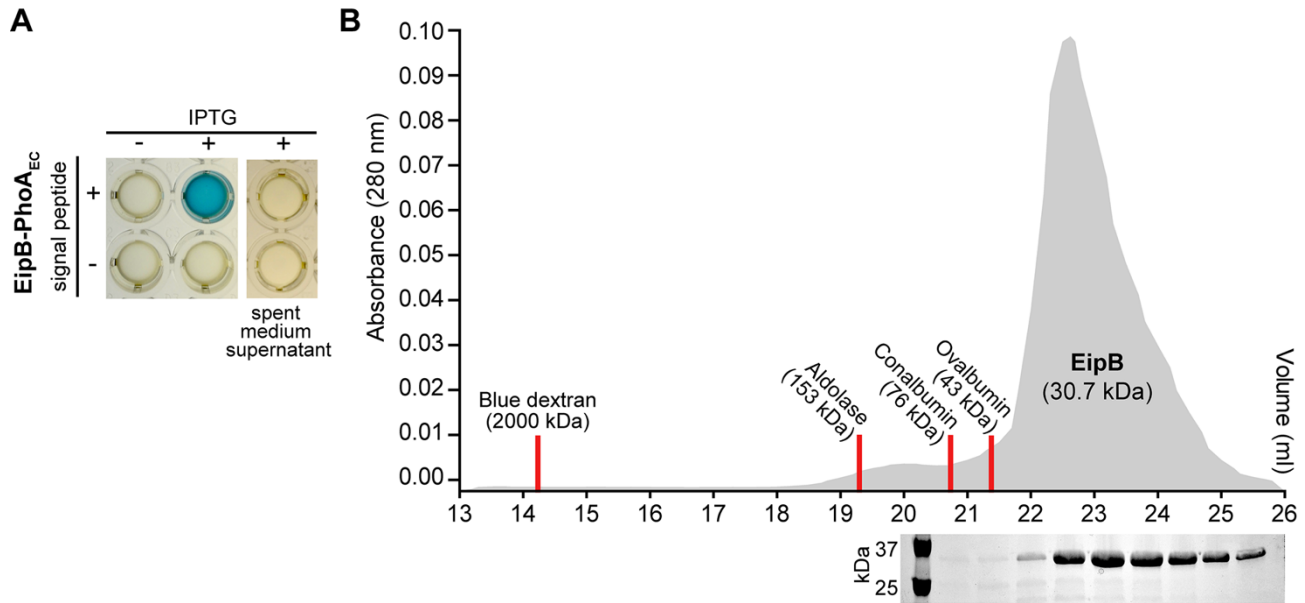

908  
909

910 **Figure 4:** EipB is monomeric in solution and is secreted to the *Brucella* periplasm. A) Alkaline  
911 phosphatase assay. Overnight cultures of *B. ovis* expressing EipB with (+) or without (-) its signal  
912 peptide and fused to *E. coli* PhoA, were grown in presence (+) or absence (-) of 1 mM IPTG inducer.  
913 In a 96-well plate, these cultures were mixed with BCIP (200  $\mu$ M final concentration) and developed  
914 for 2 hours at 37°C / 5% CO<sub>2</sub>. Only the strain expressing EipB-PhoA<sub>Ec</sub> with a signal peptide turned  
915 blue, providing evidence that the protein is located in the periplasm. As a control, spent medium  
916 supernatants were mixed with BCIP to test whether EipB-PhoA<sub>Ec</sub> is secreted into the medium. After  
917 2 hours incubation, no color change was observed, indicating that EipB-PhoA<sub>Ec</sub> is not exported  
918 outside the cell. These experiments were performed at least three times with independent clones.  
919 A representative image is shown. B) Size exclusion chromatography elution profile of purified EipB  
920 (in grey). Elution fractions were loaded on a SDS-PAGE, and a single band migrating at ~30 kDa  
921 was visible. Elution peaks of the molecular weight standards (blue dextran: 2000 kDa, aldolase: 157  
922 kDa, conalbumin: 76 kDa, ovalbumin: 43 kDa) are shown as red line. This experiment was  
923 performed twice and yielded similar elution profiles.  
924

925

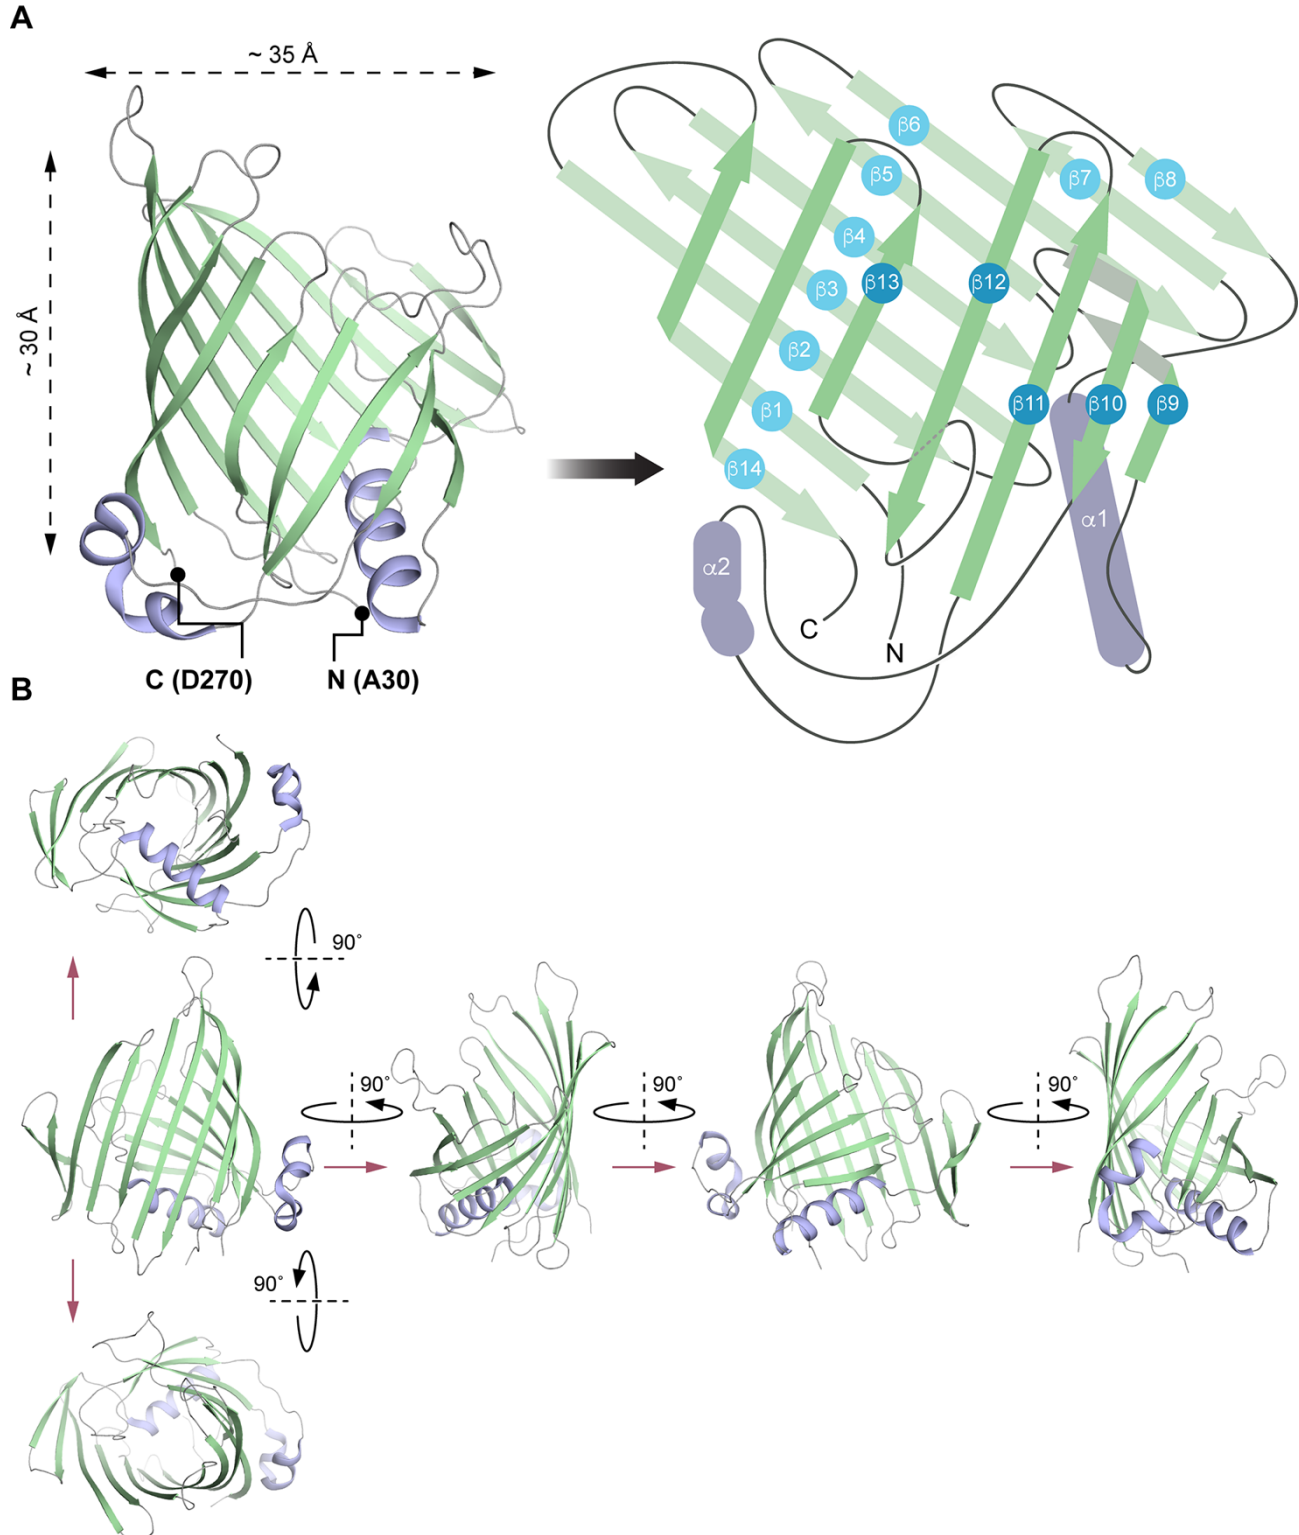

926  
927  
928  
929  
930

**Figure 5:** EipB adopts a  $\beta$ -spiral fold. A) Left: X-ray structure of EipB. EipB consist of 14  $\beta$ -strands (in green) and 2  $\alpha$ -helices (in violet). The N-terminus (A30) and the C-terminus (D270) are reported on this structure. Right: simplified representation of EipB; color code is the same as before. B) Different orientations of EipB structure; color code is the same as before.

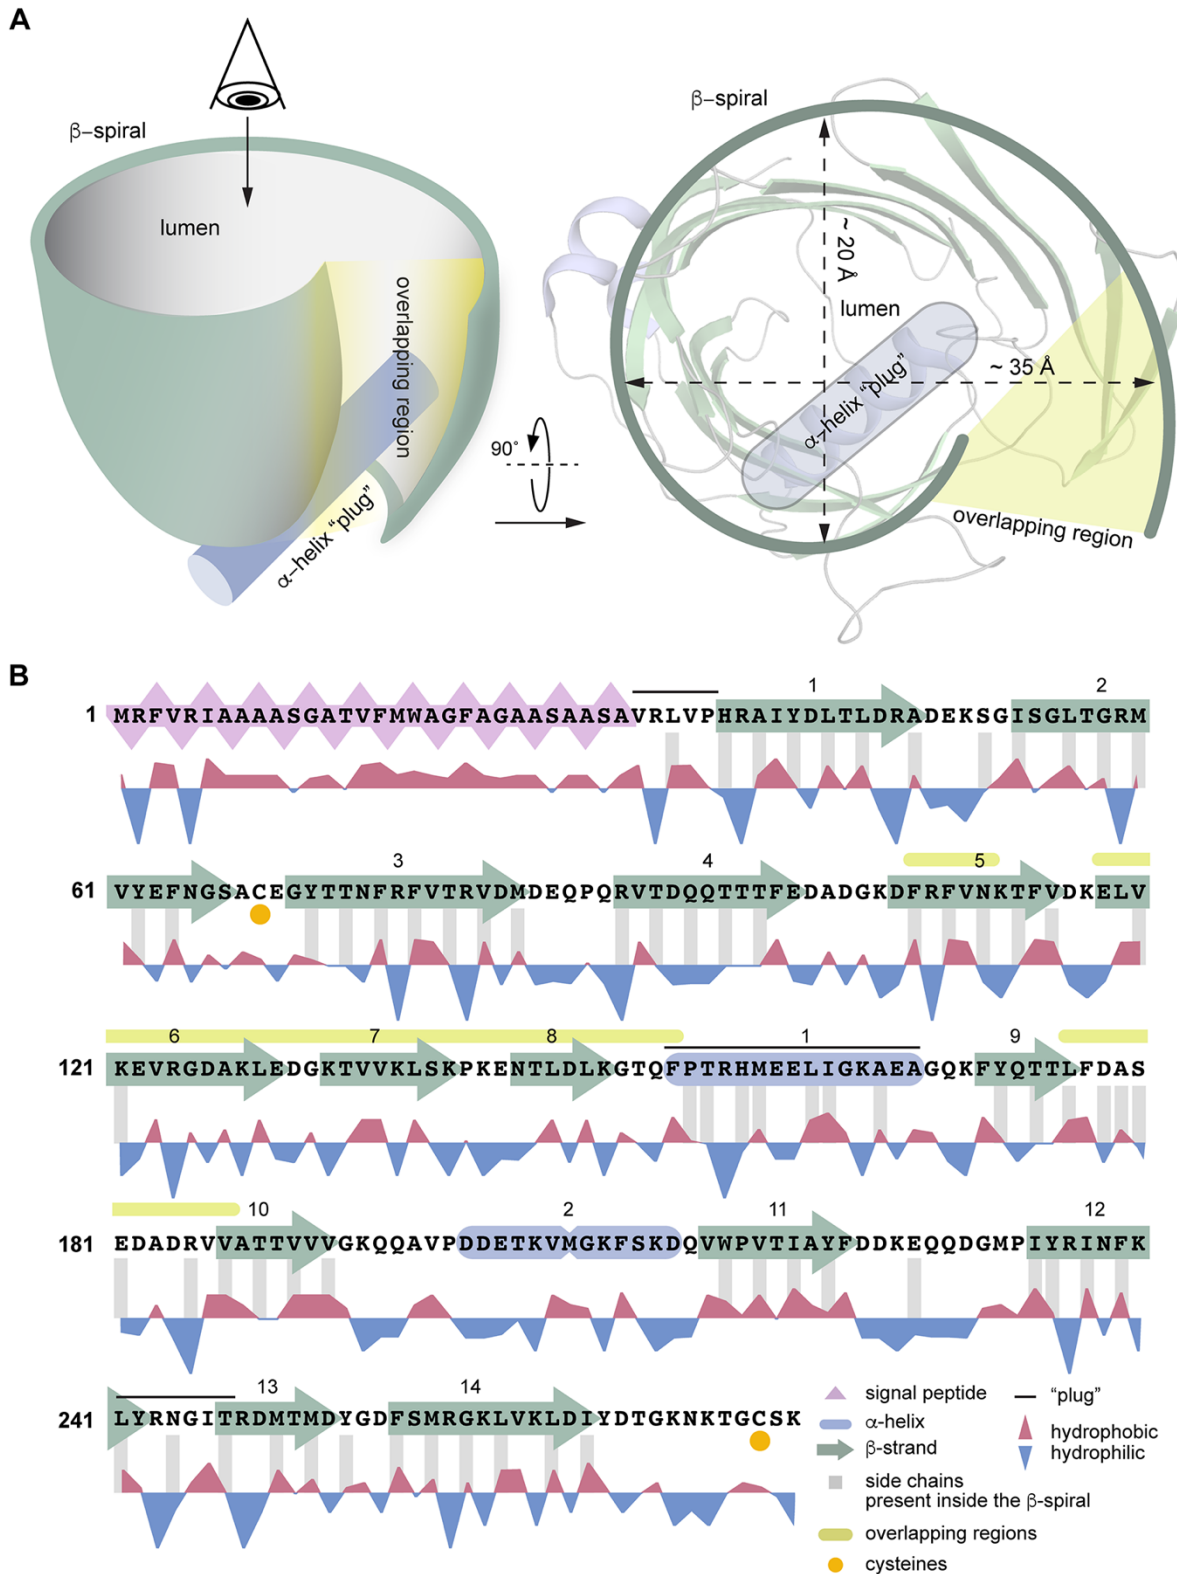

931  
 932 **Figure 6:** Simplified representation of EipB structure. A) EipB adopts a cup-like structure, fourteen  
 933  $\beta$ -strands (in green) form an overlapping  $\beta$ -spiral ( $\beta$ 5- $\beta$ 6- $\beta$ 7- $\beta$ 8 overlap with  $\beta$ 9- $\beta$ 10 connecting  
 934 loop, highlighted in yellow in panel A and B).  $\alpha$ 1 (in violet) and the loop connecting  $\beta$ 12 and  $\beta$ 13  
 935 form the bottom of this "cup". B) Amino acid sequence of EipB. The sequence corresponding to

936 the predicted signal peptide is highlighted in pink.  $\beta$ -strands and  $\alpha$ -helices are represented by  
937 green arrows and violet cylinders, respectively. Hydrophobic (red) and hydrophilic (blue) residues  
938 are reported below the sequence. Residues with side chains present inside EipB cavity are  
939 highlighted with grey bars. Cysteines C69 and C278 are highlighted with orange dots. Structural  
940 elements forming the bottom of the  $\beta$ -spiral are highlighted with a black line; overlapping regions  
941 are highlighted with a yellow line.  
942

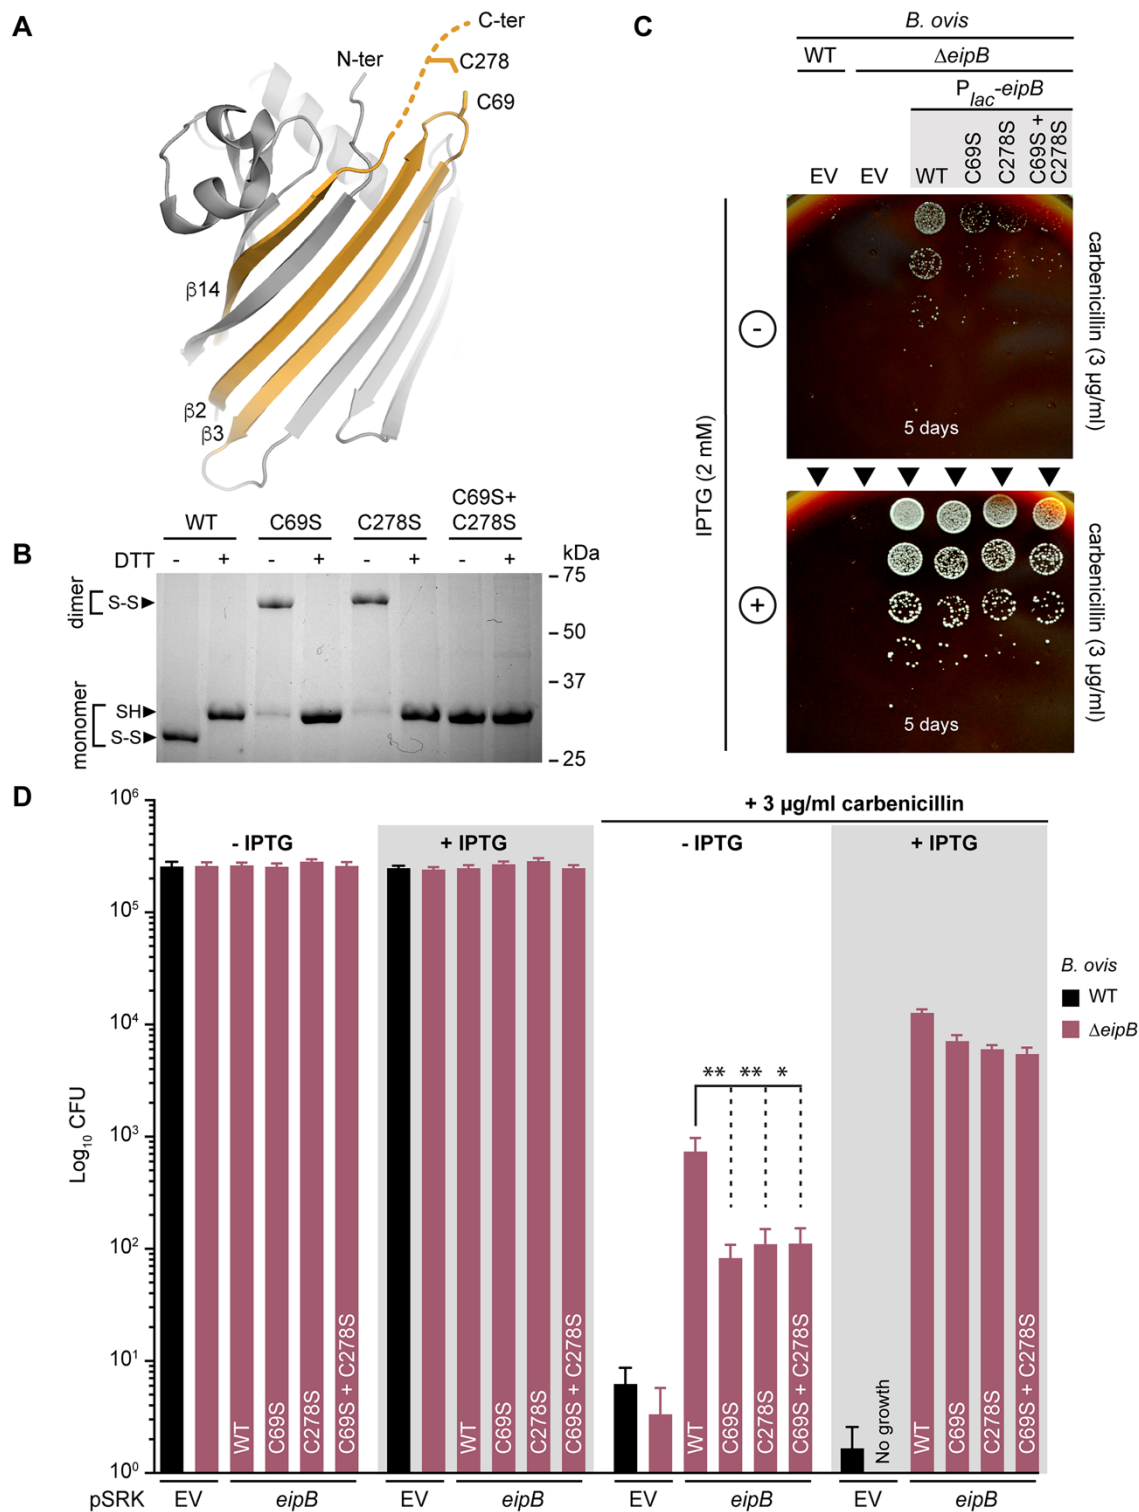

943  
944

945 **Figure 7:** EipB has an internal disulfide bond. A) Cysteines C69 and C278 are spatially proximal in  
946 the EipB structure and form a disulfide bond. C278 is present at the EipB C-terminus that follows  
947  $\beta$ 14, and C69 is present in a loop connecting  $\beta$ 2 and  $\beta$ 3. B) His-tagged wild-type EipB and EipB  
948 cysteine mutant proteins (C69S, C278S, and C69S+C278S) were purified and mixed with a protein  
949 loading buffer plus or minus 1 mM DTT. Protein samples were resolved by 12% SDS-PAGE. This

950 experiment was performed three times. Picture of a representative gel is presented. C) Growth on  
951 SBA plates containing 3 µg/ml of carbenicillin with (+) or without (-) 2 mM IPTG of a serially diluted  
952 (10-fold dilution) *B. ovis*  $\Delta eipB$  strain ectopically expressing wild-type EipB ( $P_{lac-eipB}$ ), C69S mutant  
953 ( $P_{lac-eipB}^{C69S}$ ), C278S mutant ( $P_{lac-eipB}^{C278S}$ ), or C69S+C278S mutant ( $P_{lac-eipB}^{C69S+C278S}$ ). *B. ovis* wild-  
954 type (WT) and  $\Delta eipB$  carrying the pSRK empty vector (EV) were used as a control. Days of growth  
955 at 37°C / 5% CO<sub>2</sub> are reported for each plate. A representative picture of the different plates is  
956 presented. D) Enumerated CFUs after growth on SBA plates containing 3 µg/ml of carbenicillin  
957 with (+) or without (-) 2 mM IPTG of serially diluted (10-fold dilution) *B. ovis*  $\Delta eipB$  strains expressing  
958 different versions of *eipB* from a plasmid (wild-type and cysteine mutants; see panel C legend).  
959 Empty vector (EV) strains and SBA plates with no carbenicillin, plus or minus IPTG, were used as  
960 controls. This experiment was independently performed twice with two different clones each time,  
961 and all plate assays were done in triplicate. Each data point is the mean  $\pm$  the standard error of the  
962 mean. One-way ANOVA followed by Dunnett's post test (to wild-type) supports the conclusion  
963 that *eipB*-dependent protection against the cell wall antibiotic, carbenicillin, is significantly  
964 diminished when disulfide-forming residues C69 (\*\*,  $p < 0.005$ ) and C278 (\*\*,  $p < 0.003$ ) are  
965 individually or both (\*,  $p < 0.01$ ) mutated to serine. This effect is evident with leaky *eipB* expression  
966 from  $P_{lac}$ , but diminished when expression of wild-type and mutant *eipB* alleles is induced by IPTG.  
967

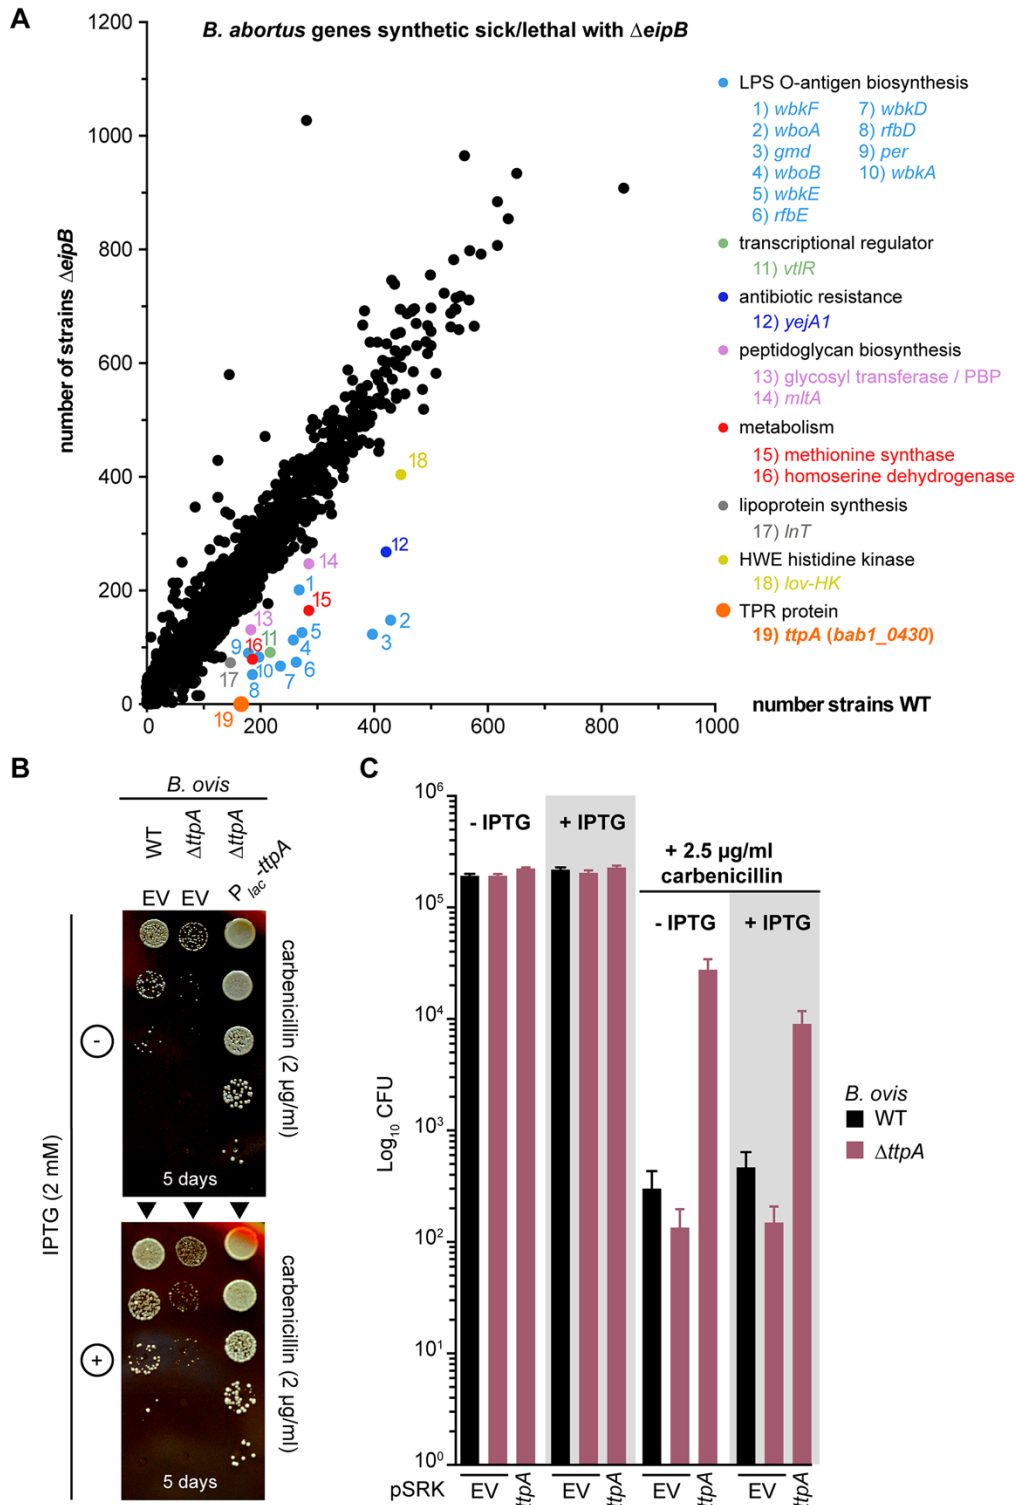

968  
969

970 **Figure 8:** *B. abortus* *eipB* deletion is synthetically lethal with Tn-Himar disruption of *bab1\_0430*,  
971 which encodes a tetratricopeptide repeat (TPR) protein. A) Identification of *B. abortus* genes that  
972 are synthetically lethal or sick with *eipB* deletion. Tn-Himar insertion strains per gene (black dots)  
973 obtained in a *B. abortus*  $\Delta eipB$  background are plotted as a function of strains per gene in a wild-  
974 type background. *bab1\_0430*, for which we observed significantly fewer insertions in  $\Delta eipB$  than



975 in wild-type, is represented as an orange dot. Other synthetic sick genes are also evident in the  
976 plot, including genes involved in LPS O-antigen synthesis in light-blue: *wbkF* (locus *bab1\_0535*);  
977 *wboA* (*bab1\_0999*); *gmd* (*bab1\_0545*); *wboB* (*bab1\_1000*); *wbkE* (*bab1\_0563*); *rfbE* (*bab1\_0542*);  
978 *wbkD* (*bab1\_0534*); *rfbD* (*bab1\_0543*); *per* (*bab1\_0544*); *wbkA* (*bab1\_0553*). Genes related to  
979 peptidoglycan synthesis in pink: *mltA* (*bab1\_2076*); penicillin-binding protein (*bab1\_607*).  
980 Apolipoprotein N-acyltransferase *Int* (*bab1\_2158*) is in grey; LysR transcriptional regulator *vtlR*  
981 (*bab1\_1517*) is in light green; extracellular solute binding protein *yejA1* (*bab1\_0010*) is in dark blue;  
982 general stress response kinase *lovhK* (*bab2\_0652*) is in yellow; metabolic genes methionine  
983 synthase (*bab1\_0188*) and homoserine dehydrogenase (*bab1\_1293*) are in red. B) Growth on SBA  
984 plates containing 2 µg/ml of carbenicillin ± 2 mM IPTG of serially diluted (10-fold dilution) *B. ovis*  
985  $\Delta ttpA$  strains carrying the pSRK empty vector (EV) or ectopically expressing wild-type TtpA ( $P_{lac}$ -  
986 *ttpA*). The wild-type (WT) *B. ovis* pSRK empty vector (EV) strain was used as a control. Days of  
987 growth at 37°C / 5% CO<sub>2</sub> are reported for each plate. A representative picture of the different  
988 plates is presented. C) Enumerated CFUs, after growth on SBA plates containing 2.5 µg/ml of  
989 carbenicillin ± 2 mM IPTG, of serially diluted (10-fold dilution) *B. ovis* wild-type (black) and  $\Delta ttpA$   
990 (dark pink) strains. The  $\Delta ttpA$  strain was either transformed with the empty vector (EV) or with  
991 pSRK-*ttpA*. Empty vector (EV) wild-type strain and SBA plates with no carbenicillin, and plus or  
992 minus IPTG were used as controls. This experiment was independently performed twice with two  
993 different clones each time, and all plate assays were done in triplicate. Each data point is the mean  
994 ± the standard error of the mean.  
995

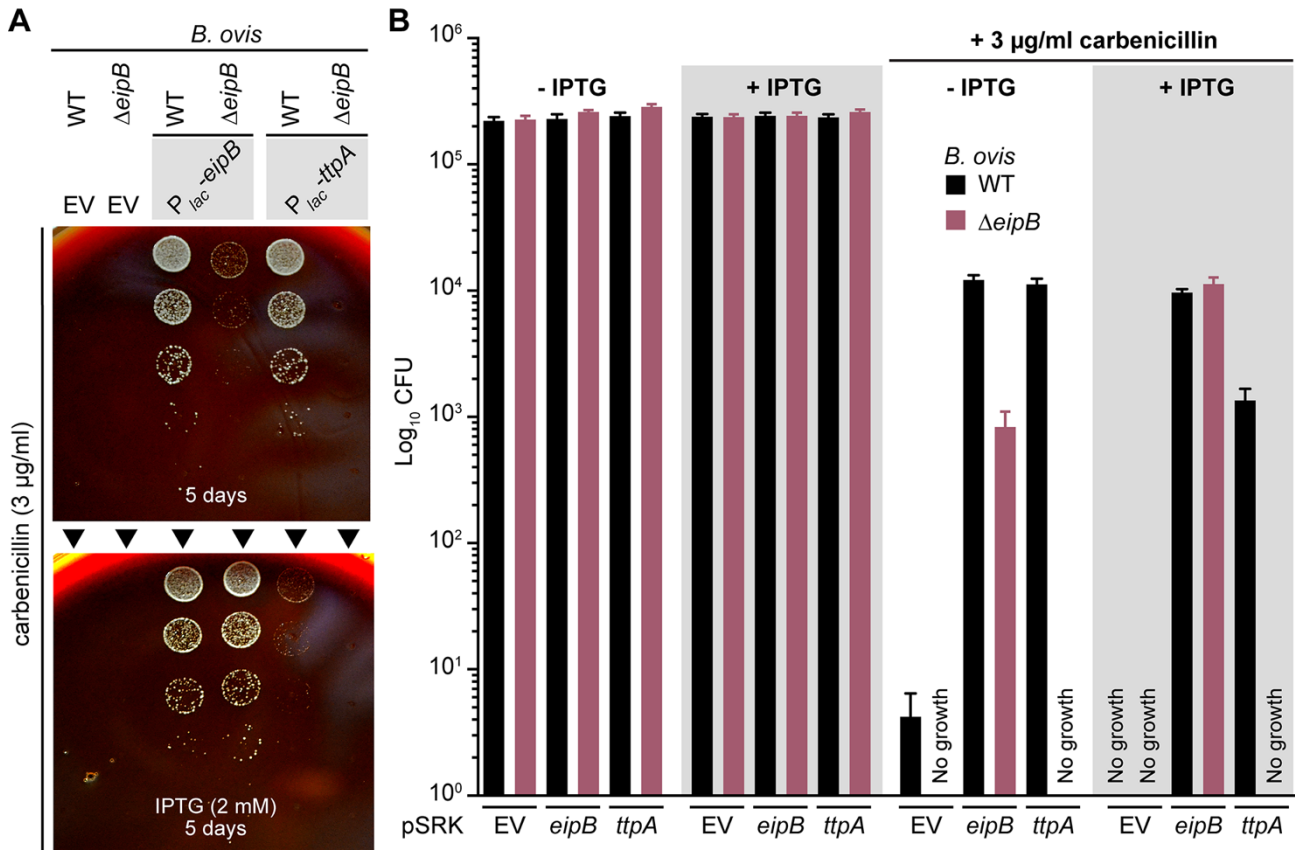

996  
997

998 **Figure 9:** Overexpression of TtpA protects against carbenicillin treatment; protection requires  
 999 EipB. A) Growth on SBA plates containing 3  $\mu$ g/ml of carbenicillin  $\pm$  2 mM IPTG of serially diluted  
 1000 (10-fold dilution) *B. ovis* wild-type (WT) and  $\Delta eipB$  strains expressing wild-type EipB ( $P_{lac}$ -*eipB*) or  
 1001 TtpA ( $P_{lac}$ -*ttpA*). *B. ovis* strains carrying the pSRK empty vector (EV) were used as a control. Days of  
 1002 growth at 37°C / 5% CO<sub>2</sub> are reported for each plate. A representative picture of the different  
 1003 plates is presented. B) Enumerated CFUs after growth on SBA plates containing 3  $\mu$ g/ml of  
 1004 carbenicillin  $\pm$  2 mM IPTG of serially diluted (10-fold dilution) *B. ovis* wild-type (black) and  $\Delta eipB$   
 1005 (dark pink) strains ectopically expressing *eipB* or *ttpA*. Empty vector (EV) strains and SBA plates  
 1006 with no carbenicillin, and plus or minus IPTG were used as controls. This experiment was  
 1007 independently performed twice with two different clones each time, and all plate assays were done  
 1008 in triplicate. Each data point is the mean  $\pm$  the standard error of the mean.
